# Supplementary material for: Reduced nucleophilicity: an intrinsic property of the Lewis base atom interacting with H in hydrogen-bonds with Lewis acids HX (X = F, Cl, Br, I, CN, CCH, CP)
Source: Royal Society of Chemistry journal article supplement (doi:10.1039/d2cp03999k), 2022-01-01
Supplement: d2cp03999k1.pdf [file d2cp03999k1.pdf]

## SUPPLEMENTARY MATERIAL

Reduced nucleophilicity: An intrinsic property of the Lewis base atom  
interacting with H in hydrogen-bonds with Lewis acids  
HX (X = F, Cl, Br, I, CN, CCH, CP)

Ibon Alkorta<sup>a</sup> and Anthony Legon<sup>b</sup>

<sup>a</sup>*Instituto de Química Médica (IQM-CSIC), Juan de la Cierva, 3, E-28006 Madrid, Spain,*

*E-mail: ibon@iqm.csic.es; Tel: +34 915622900*

<sup>b</sup>*School of Chemistry, University of Bristol, Cantock's Close, Bristol BS8 1TS, U. K.*

*E-mail: a.c.legon@bristol.ac.uk; Tel: +44 (0)117 331 7708*

### Index

- Pg. S2-45 Table S1. Optimised geometries (Å) and counterpoise corrected energies (au) of complexes B⋯HX (X = F, Cl, Br, I, CN, CCH, CP), all calculated at the CCSD(T)(F12c)/cc-pVDZ-F12 level
- Pg. S46 Table S2. Energies (au) of monomers B and HX optimised at the CCSD(T)(F12c)/cc-pVDZ-F12 level

Table S1. Optimised geometries (Å) and counterpoise corrected energies (au) of complexes B□HX (X = F, Cl, Br, I, CN, CCH, CP), all calculated at the CCSD(T)(F12c)/cc-pVDZ-F12 level.

**OC□HX**

**OC□HF**

|   |              |              |               |
|---|--------------|--------------|---------------|
| F | 0.0000000000 | 0.0000000000 | -2.1601895773 |
| H | 0.0000000000 | 0.0000000000 | -1.2369758735 |
| C | 0.0000000000 | 0.0000000000 | 0.8658219416  |
| O | 0.0000000000 | 0.0000000000 | 1.9930714075  |

$E(\text{OC}\square\text{HF}) = -213.56590658 \text{ au}$

**OC□HCl**

|    |              |              |               |
|----|--------------|--------------|---------------|
| Cl | 0.0000000000 | 0.0000000000 | -1.8949134033 |
| H  | 0.0000000000 | 0.0000000000 | -0.6166943494 |
| C  | 0.0000000000 | 0.0000000000 | 1.7759346824  |
| O  | 0.0000000000 | 0.0000000000 | 2.9045890224  |

$E(\text{OC}\square\text{HCl}) = -573.54637931 \text{ au}$

**OC□HBr**

|    |              |              |               |
|----|--------------|--------------|---------------|
| Br | 0.0000000000 | 0.0000000000 | -1.1841361949 |
| H  | 0.0000000000 | 0.0000000000 | 0.2358073361  |
| C  | 0.0000000000 | 0.0000000000 | 2.7245777905  |
| O  | 0.0000000000 | 0.0000000000 | 3.8535591978  |

$E(\text{OC}\square\text{HBr}) = -529.49888890 \text{ au}$

**OC□HI**

|   |              |              |               |
|---|--------------|--------------|---------------|
| I | 0.0000000000 | 0.0000000000 | -0.9017883128 |
| H | 0.0000000000 | 0.0000000000 | 0.7129295000  |
| C | 0.0000000000 | 0.0000000000 | 3.3975886289  |
| O | 0.0000000000 | 0.0000000000 | 4.5271169056  |

$E(\text{OC}\square\text{HI}) = -408.62269541 \text{ au}$

**OC□HCN**

|   |              |              |               |
|---|--------------|--------------|---------------|
| N | 0.0000000000 | 0.0000000000 | -1.4053632397 |
| C | 0.0000000000 | 0.0000000000 | -0.2500152102 |
| H | 0.0000000000 | 0.0000000000 | 0.8191371857  |
| C | 0.0000000000 | 0.0000000000 | 3.3755177122  |
| O | 0.0000000000 | 0.0000000000 | 4.5041381708  |

$E(\text{OC}\square\text{HCN}) = -206.48967900 \text{ au}$

**OC□HCCH**

|   |              |              |               |
|---|--------------|--------------|---------------|
| H | 0.0000000000 | 0.0000000000 | -4.1314927618 |
| C | 0.0000000000 | 0.0000000000 | -3.0684392910 |
| C | 0.0000000000 | 0.0000000000 | -1.8626815198 |
| H | 0.0000000000 | 0.0000000000 | -0.7980917383 |
| C | 0.0000000000 | 0.0000000000 | 1.8972585391  |
| O | 0.0000000000 | 0.0000000000 | 3.0268152830  |

$E(\text{OC}\square\text{HCCH}) = -190.39583915 \text{ au}$

**OC□HCP**

|   |              |              |               |
|---|--------------|--------------|---------------|
| P | 0.0000000000 | 0.0000000000 | -4.2954597411 |
| C | 0.0000000000 | 0.0000000000 | -2.7519071413 |
| H | 0.0000000000 | 0.0000000000 | -1.6790304204 |
| C | 0.0000000000 | 0.0000000000 | 1.0449134214  |
| O | 0.0000000000 | 0.0000000000 | 2.1745235915  |

$E(\text{OC}\square\text{HCP}) = -492.69176728 \text{ au}$

**SC□HX****SC□HF**

|   |              |              |               |
|---|--------------|--------------|---------------|
| F | 0.0000000000 | 0.0000000000 | -2.7637157120 |
| H | 0.0000000000 | 0.0000000000 | -1.8322082973 |
| C | 0.0000000000 | 0.0000000000 | 0.1229244962  |
| S | 0.0000000000 | 0.0000000000 | 1.6503433348  |

$E(\text{SC}\square\text{HF}) = -536.10005174 \text{ au}$

**SC□HCl**

|    |              |              |               |
|----|--------------|--------------|---------------|
| Cl | 0.0000000000 | 0.0000000000 | -2.6623801949 |
| H  | 0.0000000000 | 0.0000000000 | -1.3751317886 |
| C  | 0.0000000000 | 0.0000000000 | 0.7991176060  |
| S  | 0.0000000000 | 0.0000000000 | 2.3301966294  |

$E(\text{SC}\square\text{HCl}) = -896.07863341\text{au}$

**SC□HBr**

|    |              |              |              |
|----|--------------|--------------|--------------|
| Br | 0.0000000000 | 0.0000000000 | 5.2090568439 |
| H  | 0.0000000000 | 0.0000000000 | 3.7803192497 |
| C  | 0.0000000000 | 0.0000000000 | 1.5494905709 |
| S  | 0.0000000000 | 0.0000000000 | 0.0175333355 |

$E(\text{SC}\square\text{HBr}) = -852.03068408 \text{ au}$

**SC□HI**

|   |              |              |               |
|---|--------------|--------------|---------------|
| I | 0.0000000000 | 0.0000000000 | -3.1077378642 |
| H | 0.0000000000 | 0.0000000000 | -1.4869759202 |
| C | 0.0000000000 | 0.0000000000 | 0.9084854007  |
| S | 0.0000000000 | 0.0000000000 | 2.4422306356  |

$E(\text{SC}\square\text{HI}) = -731.15357784 \text{ au}$

**SC□HCN**

|   |              |              |               |
|---|--------------|--------------|---------------|
| N | 0.0000000000 | 0.0000000000 | -1.3403672811 |
| C | 0.0000000000 | 0.0000000000 | -0.1846415417 |
| H | 0.0000000000 | 0.0000000000 | 0.8889303946  |
| C | 0.0000000000 | 0.0000000000 | 3.2732638905  |
| S | 0.0000000000 | 0.0000000000 | 4.8049716086  |

$E(\text{SC}\square\text{HCN}) = -529.02187141 \text{ au}$

**SC□HCCH**

|   |              |              |               |
|---|--------------|--------------|---------------|
| H | 0.0000000000 | 0.0000000000 | -2.5005415406 |
| C | 0.0000000000 | 0.0000000000 | -1.4375787629 |
| C | 0.0000000000 | 0.0000000000 | -0.2312343282 |
| H | 0.0000000000 | 0.0000000000 | 0.8358979846  |
| C | 0.0000000000 | 0.0000000000 | 3.3854382272  |
| S | 0.0000000000 | 0.0000000000 | 4.9201754908  |

$E(\text{SC}\square\text{HCCH}) = -512.92608957 \text{ au}$

**SC□HCP**

|   |              |              |               |
|---|--------------|--------------|---------------|
| P | 0.0000000000 | 0.0000000000 | -1.7833727227 |
| C | 0.0000000000 | 0.0000000000 | -0.2389712479 |
| H | 0.0000000000 | 0.0000000000 | 0.8361863437  |
| C | 0.0000000000 | 0.0000000000 | 3.3934125473  |
| S | 0.0000000000 | 0.0000000000 | 4.9282224541  |

$E(\text{SC}\square\text{HCP}) = -815.22204259$  au

**SeC□HX****SeC□HF**

|    |              |              |               |
|----|--------------|--------------|---------------|
| F  | 0.0000000000 | 0.0000000000 | -3.5637765662 |
| H  | 0.0000000000 | 0.0000000000 | -2.6317393738 |
| C  | 0.0000000000 | 0.0000000000 | -0.6784128926 |
| Se | 0.0000000000 | 0.0000000000 | 0.9913592672  |

$E(\text{SeC}\square\text{HF}) = -510.38634126$  au

**SeC□HCl**

|    |              |              |               |
|----|--------------|--------------|---------------|
| Cl | 0.0000000000 | 0.0000000000 | -4.0089523826 |
| H  | 0.0000000000 | 0.0000000000 | -2.7205444974 |
| C  | 0.0000000000 | 0.0000000000 | -0.5635259784 |
| Se | 0.0000000000 | 0.0000000000 | 1.1104532931  |

$E(\text{SeC}\square\text{HCl}) = -870.36502067$  au

**SeC□HBr**

|    |              |              |               |
|----|--------------|--------------|---------------|
| Br | 0.0000000000 | 0.0000000000 | -4.1887831075 |
| H  | 0.0000000000 | 0.0000000000 | -2.7585055681 |
| C  | 0.0000000000 | 0.0000000000 | -0.5551122754 |
| Se | 0.0000000000 | 0.0000000000 | 1.1198313857  |

$E(\text{SeC}\square\text{HBr}) = -826.31710046$  au

**SeC□HI**

|    |              |              |               |
|----|--------------|--------------|---------------|
| I  | 0.0000000000 | 0.0000000000 | -4.4598104691 |
| H  | 0.0000000000 | 0.0000000000 | -2.8376714697 |
| C  | 0.0000000000 | 0.0000000000 | -0.4810149965 |
| Se | 0.0000000000 | 0.0000000000 | 1.1959273700  |

$E(\text{SeC}\square\text{HI}) = -789.50830083$  au

**SeC□HCN**

|    |              |              |               |
|----|--------------|--------------|---------------|
| N  | 0.0000000000 | 0.0000000000 | -4.9827247034 |
| C  | 0.0000000000 | 0.0000000000 | -3.8269757047 |
| H  | 0.0000000000 | 0.0000000000 | -2.7530387578 |
| C  | 0.0000000000 | 0.0000000000 | -0.3792731850 |
| Se | 0.0000000000 | 0.0000000000 | 1.2955349787  |

$E(\text{SeC}\square\text{HCN}) = -503.30820866$  au

**SeC□HCCH**

|    |              |              |               |
|----|--------------|--------------|---------------|
| H  | 0.0000000000 | 0.0000000000 | -6.1327620186 |
| C  | 0.0000000000 | 0.0000000000 | -5.0697728543 |
| C  | 0.0000000000 | 0.0000000000 | -3.8633926736 |
| H  | 0.0000000000 | 0.0000000000 | -2.7960585948 |
| C  | 0.0000000000 | 0.0000000000 | -0.2564055541 |
| Se | 0.0000000000 | 0.0000000000 | 1.4219143232  |

$E(\text{SeC}\square\text{HCN}) = -487.21230353$  au

### SeC□HCP

|    |              |              |               |
|----|--------------|--------------|---------------|
| P  | 0.0000000000 | 0.0000000000 | -5.4229866603 |
| C  | 0.0000000000 | 0.0000000000 | -3.8785657184 |
| H  | 0.0000000000 | 0.0000000000 | -2.8031343016 |
| C  | 0.0000000000 | 0.0000000000 | -0.2601406790 |
| Se | 0.0000000000 | 0.0000000000 | 1.4183499872  |

$E(\text{SeC}\square\text{HCP}) = -789.50828329$  au

### H<sub>3</sub>CNC□HX

#### H<sub>3</sub>CNC□HF

|   |               |               |               |
|---|---------------|---------------|---------------|
| C | -0.0000000000 | 0.0000000000  | -0.0074634094 |
| N | -0.0000000000 | 0.0000000000  | 1.1579956789  |
| C | 0.0000000000  | 0.0000000000  | 2.5838810107  |
| H | 1.0266242557  | 0.0000000000  | 2.9407684827  |
| H | -0.5133121279 | 0.8890826856  | 2.9407684827  |
| H | -0.5133121279 | -0.8890826856 | 2.9407684827  |
| H | -0.0000000000 | 0.0000000000  | -1.9141938391 |
| F | 0.0000000000  | 0.0000000000  | -2.8490822044 |

$E(\text{H}_3\text{CNC}\cdots\text{HF}) = -232.91269137$  au

#### H<sub>3</sub>CNC□HCl

|    |               |               |               |
|----|---------------|---------------|---------------|
| C  | -0.0000000000 | 0.0000000000  | 0.8512480515  |
| N  | -0.0000000000 | 0.0000000000  | 2.0186059302  |
| C  | 0.0000000000  | 0.0000000000  | 3.4441965725  |
| H  | 1.0263468190  | 0.0000000000  | 3.8024202379  |
| H  | -0.5131734095 | 0.8888424183  | 3.8024202379  |
| H  | -0.5131734095 | -0.8888424183 | 3.8024202379  |
| H  | -0.0000000000 | 0.0000000000  | -1.2496344222 |
| Cl | 0.0000000000  | 0.0000000000  | -2.5415302205 |

$E(\text{H}_3\text{CNC}\cdots\text{HCl}) = -592.89027711$  au

#### H<sub>3</sub>CNC□HBr

|    |               |               |               |
|----|---------------|---------------|---------------|
| C  | -0.0000000000 | 0.0000000000  | 1.8999562972  |
| N  | -0.0000000000 | 0.0000000000  | 3.0677164025  |
| C  | -0.0000000000 | 0.0000000000  | 4.4933213568  |
| H  | 1.0262664454  | 0.0000000000  | 4.8517396422  |
| H  | -0.5131332227 | 0.8887728128  | 4.8517396422  |
| H  | -0.5131332227 | -0.8887728128 | 4.8517396422  |
| H  | -0.0000000000 | 0.0000000000  | -0.2455677527 |
| Br | 0.0000000000  | 0.0000000000  | -1.6792840289 |

$E(\text{H}_3\text{CNC}\cdots\text{HBr}) = -548.84204881$  au

#### H<sub>3</sub>CNC□HI

|   |               |               |               |
|---|---------------|---------------|---------------|
| C | -0.0000000000 | 0.0000000000  | 2.6250994828  |
| N | -0.0000000000 | 0.0000000000  | 3.7938465978  |
| C | -0.0000000000 | 0.0000000000  | 5.2192252943  |
| H | 1.0260713261  | 0.0000000000  | 5.5785110540  |
| H | -0.5130356630 | 0.8886038345  | 5.5785110540  |
| H | -0.5130356630 | -0.8886038345 | 5.5785110540  |
| H | -0.0000000000 | 0.0000000000  | 0.3279121597  |
| I | 0.0000000000  | 0.0000000000  | -1.2966854454 |

$E(\text{H}_3\text{CNC}\cdots\text{HI}) = -427.96439054 \text{ au}$

### **H<sub>3</sub>CNC□HCN**

|   |               |               |               |
|---|---------------|---------------|---------------|
| C | -0.0000000000 | 0.0000000000  | 0.7382580586  |
| N | -0.0000000000 | 0.0000000000  | 1.9063146866  |
| C | 0.0000000000  | 0.0000000000  | 3.3321385961  |
| H | 1.0262258276  | 0.0000000000  | 3.6906299077  |
| H | -0.5131129138 | 0.8887376367  | 3.6906299077  |
| H | -0.5131129138 | -0.8887376367 | 3.6906299077  |
| H | -0.0000000000 | 0.0000000000  | -1.5752324479 |
| C | 0.0000000000  | 0.0000000000  | -2.6509949347 |
| N | 0.0000000000  | 0.0000000000  | -3.8068690494 |

$E(\text{H}_3\text{CNC}\cdots\text{HCN}) = -225.83372685 \text{ au}$

### **H<sub>3</sub>CNC□HCCH**

|   |               |               |               |
|---|---------------|---------------|---------------|
| C | -0.0000000000 | 0.0000000000  | 0.7706856853  |
| N | -0.0000000000 | 0.0000000000  | 1.9402890367  |
| C | 0.0000000000  | 0.0000000000  | 3.3652995711  |
| H | 1.0257984588  | 0.0000000000  | 3.7255175794  |
| H | -0.5128992294 | 0.8883675245  | 3.7255175794  |
| H | -0.5128992294 | -0.8883675245 | 3.7255175794  |
| H | -0.0000000000 | 0.0000000000  | -1.7125078706 |
| C | 0.0000000000  | 0.0000000000  | -2.7811669426 |
| C | 0.0000000000  | 0.0000000000  | -3.9878540706 |
| H | 0.0000000000  | 0.0000000000  | -5.0507404794 |

$E(\text{H}_3\text{CNC}\cdots\text{HCCH}) = -209.73660446 \text{ au}$

### **H<sub>3</sub>CNC□HCP**

|   |               |               |               |
|---|---------------|---------------|---------------|
| C | -0.0000000000 | 0.0000000000  | 1.7288543109  |
| N | -0.0000000000 | 0.0000000000  | 2.8984695987  |
| C | -0.0000000000 | 0.0000000000  | 4.3235696566  |
| H | 1.0258188412  | 0.0000000000  | 4.6837393160  |
| H | -0.5129094206 | 0.8883851762  | 4.6837393160  |
| H | -0.5129094206 | -0.8883851762 | 4.6837393160  |
| H | -0.0000000000 | 0.0000000000  | -0.7576287071 |
| C | 0.0000000000  | 0.0000000000  | -1.8341289052 |
| P | 0.0000000000  | 0.0000000000  | -3.3790885078 |

$E(\text{H}_3\text{CNC}\cdots\text{HCP}) = -512.03256991 \text{ au}$

### **HNC□HX**

#### **HNC□HF**

|   |              |              |               |
|---|--------------|--------------|---------------|
| H | 0.0000000000 | 0.0000000000 | 0.9375481277  |
| N | 0.0000000000 | 0.0000000000 | -0.0598122320 |
| C | 0.0000000000 | 0.0000000000 | -1.2248614503 |
| H | 0.0000000000 | 0.0000000000 | -3.1679686679 |
| F | 0.0000000000 | 0.0000000000 | -4.0996997507 |

$E(\text{HNC}\square\text{HF}) = -193.66203371 \text{ au}$

#### **HNC□HCl**

|   |              |              |               |
|---|--------------|--------------|---------------|
| H | 0.0000000000 | 0.0000000000 | 0.9101756808  |
| N | 0.0000000000 | 0.0000000000 | -0.0870671589 |
| C | 0.0000000000 | 0.0000000000 | -1.2541585102 |
| H | 0.0000000000 | 0.0000000000 | -3.4181834588 |

|                                                             |              |              |               |
|-------------------------------------------------------------|--------------|--------------|---------------|
| Cl                                                          | 0.0000000000 | 0.0000000000 | -4.7055605261 |
| $E(\text{HNC}\square\text{HCl}) = -553.64017031 \text{ au}$ |              |              |               |

**HNC□HBr**

|                                                             |              |              |               |
|-------------------------------------------------------------|--------------|--------------|---------------|
| H                                                           | 0.0000000000 | 0.0000000000 | 0.9030664902  |
| N                                                           | 0.0000000000 | 0.0000000000 | -0.0941438094 |
| C                                                           | 0.0000000000 | 0.0000000000 | -1.2617309724 |
| H                                                           | 0.0000000000 | 0.0000000000 | -3.4866485185 |
| Br                                                          | 0.0000000000 | 0.0000000000 | -4.9153371631 |
| $E(\text{HNC}\square\text{HBr}) = -509.59206813 \text{ au}$ |              |              |               |

**HNC□HI**

|                                                            |              |              |               |
|------------------------------------------------------------|--------------|--------------|---------------|
| H                                                          | 0.0000000000 | 0.0000000000 | 0.9120155037  |
| N                                                          | 0.0000000000 | 0.0000000000 | -0.0850518160 |
| C                                                          | 0.0000000000 | 0.0000000000 | -1.2536299453 |
| H                                                          | 0.0000000000 | 0.0000000000 | -3.6437633862 |
| I                                                          | 0.0000000000 | 0.0000000000 | -5.2643643294 |
| $E(\text{HNC}\square\text{HI}) = -388.71479243 \text{ au}$ |              |              |               |

**HNC□HCN**

|                                                             |              |              |               |
|-------------------------------------------------------------|--------------|--------------|---------------|
| H                                                           | 0.0000000000 | 0.0000000000 | 1.0936623126  |
| N                                                           | 0.0000000000 | 0.0000000000 | 0.0963513079  |
| C                                                           | 0.0000000000 | 0.0000000000 | -1.0712269059 |
| H                                                           | 0.0000000000 | 0.0000000000 | -3.4324148947 |
| C                                                           | 0.0000000000 | 0.0000000000 | -4.5062672367 |
| N                                                           | 0.0000000000 | 0.0000000000 | -5.6620128749 |
| $E(\text{HNC}\square\text{HCN}) = -186.58369257 \text{ au}$ |              |              |               |

**HNC□HCCH**

|                                                              |              |              |               |
|--------------------------------------------------------------|--------------|--------------|---------------|
| H                                                            | 0.0000000000 | 0.0000000000 | 1.2110255039  |
| N                                                            | 0.0000000000 | 0.0000000000 | 0.2142277774  |
| C                                                            | 0.0000000000 | 0.0000000000 | -0.9549414562 |
| H                                                            | 0.0000000000 | 0.0000000000 | -3.4818664123 |
| C                                                            | 0.0000000000 | 0.0000000000 | -4.5493760242 |
| C                                                            | 0.0000000000 | 0.0000000000 | -5.7558333714 |
| H                                                            | 0.0000000000 | 0.0000000000 | -6.8187443088 |
| $E(\text{HNC}\square\text{HCCH}) = -170.48736156 \text{ au}$ |              |              |               |

**HNC□HCP**

|                                                             |              |              |               |
|-------------------------------------------------------------|--------------|--------------|---------------|
| H                                                           | 0.0000000000 | 0.0000000000 | 1.1759404679  |
| N                                                           | 0.0000000000 | 0.0000000000 | 0.1790938716  |
| C                                                           | 0.0000000000 | 0.0000000000 | -0.9901070650 |
| H                                                           | 0.0000000000 | 0.0000000000 | -3.5246815434 |
| C                                                           | 0.0000000000 | 0.0000000000 | -4.6000778053 |
| P                                                           | 0.0000000000 | 0.0000000000 | -6.1446762174 |
| $E(\text{HNC}\square\text{HCP}) = -472.78329734 \text{ au}$ |              |              |               |

**FNC□HX**

**FNC□HF**

|   |              |              |               |
|---|--------------|--------------|---------------|
| F | 0.0000000000 | 0.0000000000 | 1.1883479181  |
| N | 0.0000000000 | 0.0000000000 | -0.1088055850 |
| C | 0.0000000000 | 0.0000000000 | -1.2798653071 |
| H | 0.0000000000 | 0.0000000000 | -3.2750337908 |

|   |              |              |               |
|---|--------------|--------------|---------------|
| F | 0.0000000000 | 0.0000000000 | -4.2029583067 |
|---|--------------|--------------|---------------|

$E(\text{FNC}\square\text{HF}) = -292.70570193 \text{ au}$

**FNC□HCI**

|    |              |              |               |
|----|--------------|--------------|---------------|
| F  | 0.0000000000 | 0.0000000000 | 1.2692907511  |
| N  | 0.0000000000 | 0.0000000000 | -0.0308316611 |
| C  | 0.0000000000 | 0.0000000000 | -1.2048248812 |
| H  | 0.0000000000 | 0.0000000000 | -3.4385294361 |
| Cl | 0.0000000000 | 0.0000000000 | -4.7217198441 |

$E(\text{HNC}\square\text{HCI}) = -652.68486001 \text{ au}$

**FNC□HBr**

|    |              |              |               |
|----|--------------|--------------|---------------|
| F  | 0.0000000000 | 0.0000000000 | 1.2810533339  |
| N  | 0.0000000000 | 0.0000000000 | -0.0198960231 |
| C  | 0.0000000000 | 0.0000000000 | -1.1945943070 |
| H  | 0.0000000000 | 0.0000000000 | -3.4983474822 |
| Br | 0.0000000000 | 0.0000000000 | -4.9229722865 |

$E(\text{FNC}\square\text{HBr}) = -608.63701862 \text{ au}$

**FNC□HI**

|   |              |              |               |
|---|--------------|--------------|---------------|
| F | 0.0000000000 | 0.0000000000 | 1.2526748439  |
| N | 0.0000000000 | 0.0000000000 | -0.0497460074 |
| C | 0.0000000000 | 0.0000000000 | -1.2257281103 |
| H | 0.0000000000 | 0.0000000000 | -3.6971121295 |
| I | 0.0000000000 | 0.0000000000 | -5.3148480737 |

$E(\text{FNC}\square\text{HI}) = -487.76021762 \text{ au}$

**FNC□HCN**

|   |              |              |               |
|---|--------------|--------------|---------------|
| F | 0.0000000000 | 0.0000000000 | 1.3890777908  |
| N | 0.0000000000 | 0.0000000000 | 0.0890417963  |
| C | 0.0000000000 | 0.0000000000 | -1.0853235221 |
| H | 0.0000000000 | 0.0000000000 | -3.4951787163 |
| C | 0.0000000000 | 0.0000000000 | -4.5670698542 |
| N | 0.0000000000 | 0.0000000000 | -5.7226680988 |

$E(\text{FNC}\square\text{HCN}) = -285.62841191 \text{ au}$

**FNC□HCCh**

|   |              |              |               |
|---|--------------|--------------|---------------|
| F | 0.0000000000 | 0.0000000000 | 1.5163513989  |
| N | 0.0000000000 | 0.0000000000 | 0.2134793674  |
| C | 0.0000000000 | 0.0000000000 | -0.9629399735 |
| H | 0.0000000000 | 0.0000000000 | -3.5320348143 |
| C | 0.0000000000 | 0.0000000000 | -4.5982647625 |
| C | 0.0000000000 | 0.0000000000 | -5.8044273723 |
| H | 0.0000000000 | 0.0000000000 | -6.8673976391 |

$E(\text{FNC}\square\text{HCCh}) = -269.53303776$

**FNC□HCP**

|   |              |              |               |
|---|--------------|--------------|---------------|
| F | 0.0000000000 | 0.0000000000 | 1.4823166313  |
| N | 0.0000000000 | 0.0000000000 | 0.1793756776  |
| C | 0.0000000000 | 0.0000000000 | -0.9971300599 |
| H | 0.0000000000 | 0.0000000000 | -3.5753311933 |
| C | 0.0000000000 | 0.0000000000 | -4.6496553041 |
| P | 0.0000000000 | 0.0000000000 | -6.1938245111 |



$E(\text{FNC}\square\text{HCP}) = -571.82897815 \text{ au}$

### $\text{H}_3\text{CCN}\square\text{HX}$

#### $\text{H}_3\text{CCN}\square\text{HF}$

|   |               |               |               |
|---|---------------|---------------|---------------|
| H | -0.0000000000 | 0.0000000000  | 1.8189975659  |
| F | -0.0000000000 | 0.0000000000  | 2.7510792054  |
| N | 0.0000000000  | 0.0000000000  | 0.0044495452  |
| C | 0.0000000000  | 0.0000000000  | -1.1496241290 |
| C | 0.0000000000  | 0.0000000000  | -2.6105156211 |
| H | 1.0247765586  | 0.0000000000  | -2.9753063122 |
| H | -0.5123882793 | -0.8874825329 | -2.9753063122 |
| H | -0.5123882793 | 0.8874825329  | -2.9753063122 |

$E(\text{CH}_3\text{CN}\square\text{HF}) = -232.95097095 \text{ au}$

#### $\text{H}_3\text{CCN}\square\text{HCl}$

|    |               |               |               |
|----|---------------|---------------|---------------|
| H  | 0.0000000000  | 0.0000000000  | 1.1794122276  |
| Cl | -0.0000000000 | 0.0000000000  | 2.4674898305  |
| N  | 0.0000000000  | 0.0000000000  | -0.8363422990 |
| C  | 0.0000000000  | 0.0000000000  | -1.9917578342 |
| C  | -0.0000000000 | 0.0000000000  | -3.4532859955 |
| H  | 1.0244556152  | 0.0000000000  | -3.8191458872 |
| H  | -0.5122278076 | -0.8872045879 | -3.8191458872 |
| H  | -0.5122278076 | 0.8872045879  | -3.8191458872 |

$E(\text{CH}_3\text{CN}\square\text{HCl}) = -592.92863788 \text{ au}$

#### $\text{H}_3\text{CCN}\square\text{HBr}$

|    |               |               |               |
|----|---------------|---------------|---------------|
| H  | 0.0000000000  | 0.0000000000  | 0.2086173073  |
| Br | 0.0000000000  | 0.0000000000  | 1.6374908350  |
| N  | 0.0000000000  | 0.0000000000  | -1.8686229026 |
| C  | 0.0000000000  | 0.0000000000  | -3.0243282656 |
| C  | 0.0000000000  | 0.0000000000  | -4.4860395431 |
| H  | 1.0244097082  | 0.0000000000  | -4.8521648922 |
| H  | -0.5122048541 | -0.8871648312 | -4.8521648922 |
| H  | -0.5122048541 | 0.8871648312  | -4.8521648922 |

$E(\text{CH}_3\text{CN}\square\text{HBr}) = -548.88034569 \text{ au}$

#### $\text{H}_3\text{CCN}\square\text{HI}$

|   |               |               |               |
|---|---------------|---------------|---------------|
| H | 0.0000000000  | 0.0000000000  | -0.3549407972 |
| I | 0.0000000000  | 0.0000000000  | 1.2658727751  |
| N | 0.0000000000  | 0.0000000000  | -2.5802506989 |
| C | 0.0000000000  | 0.0000000000  | -3.7365053520 |
| C | 0.0000000000  | 0.0000000000  | -5.1985601357 |
| H | 1.0242257090  | 0.0000000000  | -5.5652991260 |
| H | -0.5121128545 | -0.8870054832 | -5.5652991260 |
| H | -0.5121128545 | 0.8870054832  | -5.5652991260 |

$E(\text{CH}_3\text{CN}\square\text{HI}) = -428.00285321 \text{ au}$

#### $\text{H}_3\text{CCN}\square\text{HCN}$

|   |               |              |               |
|---|---------------|--------------|---------------|
| N | -0.0000000000 | 0.0000000000 | 3.5530096569  |
| C | -0.0000000000 | 0.0000000000 | 2.3971446485  |
| H | 0.0000000000  | 0.0000000000 | 1.3221749205  |
| N | 0.0000000000  | 0.0000000000 | -0.8401824017 |

|   |               |               |               |
|---|---------------|---------------|---------------|
| C | 0.0000000000  | 0.0000000000  | -1.9960740155 |
| C | -0.0000000000 | 0.0000000000  | -3.4577392765 |
| H | 1.0243981893  | 0.0000000000  | -3.8238076491 |
| H | -0.5121990946 | -0.8871548555 | -3.8238076491 |
| H | -0.5121990946 | 0.8871548555  | -3.8238076491 |

$E(\text{CH}_3\text{CN}\square\text{HCN}) = -225.87272827 \text{ au}$

### **H<sub>3</sub>CCN□HCCH**

|   |               |               |               |
|---|---------------|---------------|---------------|
| H | 0.0000000000  | 0.0000000000  | 4.7394045816  |
| C | 0.0000000000  | 0.0000000000  | 3.6765527207  |
| C | -0.0000000000 | 0.0000000000  | 2.4698392614  |
| H | -0.0000000000 | 0.0000000000  | 1.4014924307  |
| N | -0.0000000000 | 0.0000000000  | -0.9222763387 |
| C | -0.0000000000 | 0.0000000000  | -2.0787257188 |
| C | 0.0000000000  | 0.0000000000  | -3.5408735635 |
| H | 1.0240151301  | 0.0000000000  | -3.9081675962 |
| H | -0.5120075650 | -0.8868231166 | -3.9081675962 |
| H | -0.5120075650 | 0.8868231166  | -3.9081675962 |

$E(\text{CH}_3\text{CN}\square\text{HCCH}) = -209.77545252 \text{ au}$

### **H<sub>3</sub>CCN□HCP**

|   |               |               |               |
|---|---------------|---------------|---------------|
| P | 0.0000000000  | 0.0000000000  | 4.0625446102  |
| C | -0.0000000000 | 0.0000000000  | 2.5175496415  |
| H | -0.0000000000 | 0.0000000000  | 1.4414489354  |
| N | -0.0000000000 | 0.0000000000  | -0.8903990812 |
| C | -0.0000000000 | 0.0000000000  | -2.0469125066 |
| C | 0.0000000000  | 0.0000000000  | -3.5090438124 |
| H | 1.0240103610  | 0.0000000000  | -3.8763590673 |
| H | -0.5120051804 | -0.8868189863 | -3.8763590673 |
| H | -0.5120051804 | 0.8868189863  | -3.8763590673 |

$E(\text{CH}_3\text{CN}\square\text{HCP}) = -512.07139725 \text{ au}$

## **HCN□HX**

### **HCN□HF**

|   |              |              |               |
|---|--------------|--------------|---------------|
| F | 0.0000000000 | 0.0000000000 | -1.9635857216 |
| H | 0.0000000000 | 0.0000000000 | -1.0347148699 |
| N | 0.0000000000 | 0.0000000000 | 0.8242638477  |
| C | 0.0000000000 | 0.0000000000 | 1.9760332815  |
| H | 0.0000000000 | 0.0000000000 | 3.0432928311  |

$E(\text{HCN}\square\text{HF}) = -193.68517740\text{au}$

### **HCN□HCl**

|    |              |              |               |
|----|--------------|--------------|---------------|
| Cl | 0.0000000000 | 0.0000000000 | -1.7097811080 |
| H  | 0.0000000000 | 0.0000000000 | -0.4257769854 |
| N  | 0.0000000000 | 0.0000000000 | 1.6641462633  |
| C  | 0.0000000000 | 0.0000000000 | 2.8173576452  |
| H  | 0.0000000000 | 0.0000000000 | 3.8845935508  |

$E(\text{HCN}\square\text{HCl}) = -553.66353812 \text{ au}$

### **HCN□HBr**

|    |              |              |               |
|----|--------------|--------------|---------------|
| Br | 0.0000000000 | 0.0000000000 | -1.0602471671 |
|----|--------------|--------------|---------------|

|   |              |              |              |
|---|--------------|--------------|--------------|
| H | 0.0000000000 | 0.0000000000 | 0.3647246916 |
| N | 0.0000000000 | 0.0000000000 | 2.5256410440 |
| C | 0.0000000000 | 0.0000000000 | 3.6791627217 |
| H | 0.0000000000 | 0.0000000000 | 4.7463630487 |

$E(\text{HCN}\square\text{HBr}) = -509.61542595 \text{ au}$

#### HCN□HI

|   |              |              |               |
|---|--------------|--------------|---------------|
| I | 0.0000000000 | 0.0000000000 | -0.8011417304 |
| H | 0.0000000000 | 0.0000000000 | 0.8169692118  |
| N | 0.0000000000 | 0.0000000000 | 3.1357423687  |
| C | 0.0000000000 | 0.0000000000 | 4.2898091308  |
| H | 0.0000000000 | 0.0000000000 | 5.3569217389  |

$E(\text{HCN}\square\text{HI}) = -388.73831553 \text{ au}$

#### HCN□HCN

|   |              |              |               |
|---|--------------|--------------|---------------|
| N | 0.0000000000 | 0.0000000000 | -3.6841007575 |
| C | 0.0000000000 | 0.0000000000 | -2.5284058081 |
| H | 0.0000000000 | 0.0000000000 | -1.4555059138 |
| N | 0.0000000000 | 0.0000000000 | 0.7625672393  |
| C | 0.0000000000 | 0.0000000000 | 1.9160545306  |
| H | 0.0000000000 | 0.0000000000 | 2.9833567472  |

$E(\text{HCN}\square\text{HCN}) = -186.60757895 \text{ au}$

#### HCN□HCCH

|   |              |              |               |
|---|--------------|--------------|---------------|
| H | 0.0000000000 | 0.0000000000 | -4.0302052661 |
| C | 0.0000000000 | 0.0000000000 | -2.9673069916 |
| C | 0.0000000000 | 0.0000000000 | -1.7608886068 |
| H | 0.0000000000 | 0.0000000000 | -0.6938001963 |
| N | 0.0000000000 | 0.0000000000 | 1.6813499701  |
| C | 0.0000000000 | 0.0000000000 | 2.8355593437  |
| H | 0.0000000000 | 0.0000000000 | 3.9025380766  |

$E(\text{HCN}\square\text{HCCH}) = -170.51121892 \text{ au}$

#### HCN□HCP

|   |              |              |               |
|---|--------------|--------------|---------------|
| P | 0.0000000000 | 0.0000000000 | -4.1467634618 |
| C | 0.0000000000 | 0.0000000000 | -2.6022035951 |
| H | 0.0000000000 | 0.0000000000 | -1.5272852262 |
| N | 0.0000000000 | 0.0000000000 | 0.8598714976  |
| C | 0.0000000000 | 0.0000000000 | 2.0141419716  |
| H | 0.0000000000 | 0.0000000000 | 3.0811361228  |

$E(\text{HCN}\square\text{HCP}) = -472.80713698 \text{ au}$

#### FCN□HX

##### FCN□HF

|   |              |              |               |
|---|--------------|--------------|---------------|
| N | 0.0000000000 | 0.0000000000 | -0.0700935424 |
| C | 0.0000000000 | 0.0000000000 | 1.0843655073  |
| F | 0.0000000000 | 0.0000000000 | 2.3440437505  |
| H | 0.0000000000 | 0.0000000000 | -1.9472150604 |
| F | 0.0000000000 | 0.0000000000 | -2.8746322131 |

$E(\text{FCN}\cdots\text{HF}) = -292.82075963 \text{ au}$

##### FCN□HCl

|    |              |              |               |
|----|--------------|--------------|---------------|
| N  | 0.0000000000 | 0.0000000000 | 0.7669179873  |
| C  | 0.0000000000 | 0.0000000000 | 1.9231221206  |
| F  | 0.0000000000 | 0.0000000000 | 3.1849569204  |
| H  | 0.0000000000 | 0.0000000000 | -1.3405361236 |
| Cl | 0.0000000000 | 0.0000000000 | -2.6231741083 |

$E(\text{FCN}\cdots\text{HCl}) = -652.79955326 \text{ au}$

#### FCN□HBr

Proton transfers

#### FCN□HI

Proton transfers

#### FCN□HCN

|   |              |              |               |
|---|--------------|--------------|---------------|
| N | 0.0000000000 | 0.0000000000 | 0.6173526329  |
| C | 0.0000000000 | 0.0000000000 | 1.7739442083  |
| F | 0.0000000000 | 0.0000000000 | 3.0354983852  |
| H | 0.0000000000 | 0.0000000000 | -1.6117949444 |
| C | 0.0000000000 | 0.0000000000 | -2.6839617072 |
| N | 0.0000000000 | 0.0000000000 | -3.8396042703 |

$E(\text{FCN}\cdots\text{HCN}) = -285.74356858 \text{ au}$

#### FCN□HCCH

|   |              |              |               |
|---|--------------|--------------|---------------|
| N | 0.0000000000 | 0.0000000000 | 0.6408803231  |
| C | 0.0000000000 | 0.0000000000 | 1.7981864945  |
| F | 0.0000000000 | 0.0000000000 | 3.0621233900  |
| H | 0.0000000000 | 0.0000000000 | -1.7422898353 |
| C | 0.0000000000 | 0.0000000000 | -2.8088663479 |
| C | 0.0000000000 | 0.0000000000 | -4.0151728036 |
| H | 0.0000000000 | 0.0000000000 | -5.0780817068 |

$E(\text{FCN}\cdots\text{HCCH}) = -269.64760049 \text{ au}$

#### FCN□HCP

|   |              |              |               |
|---|--------------|--------------|---------------|
| N | 0.0000000000 | 0.0000000000 | 1.5696148454  |
| C | 0.0000000000 | 0.0000000000 | 2.7270108406  |
| F | 0.0000000000 | 0.0000000000 | 3.9909680161  |
| H | 0.0000000000 | 0.0000000000 | -0.8305401070 |
| C | 0.0000000000 | 0.0000000000 | -1.9050710729 |
| P | 0.0000000000 | 0.0000000000 | -3.4494717023 |

$E(\text{FCN}\cdots\text{HCP}) = -571.94351738 \text{ au}$

#### N<sub>2</sub>□HX

##### N<sub>2</sub>□HF

|   |              |              |               |
|---|--------------|--------------|---------------|
| F | 0.0000000000 | 0.0000000000 | -2.1005650526 |
| H | 0.0000000000 | 0.0000000000 | -1.1803137730 |
| N | 0.0000000000 | 0.0000000000 | 0.9179185013  |
| N | 0.0000000000 | 0.0000000000 | 2.0160743965  |

$E(\text{N}_2\cdots\text{HF}) = -209.78158728 \text{ au}$

##### N<sub>2</sub>□HCl

|    |              |              |               |
|----|--------------|--------------|---------------|
| Cl | 0.0000000000 | 0.0000000000 | -1.8549706581 |
| H  | 0.0000000000 | 0.0000000000 | -0.5789133926 |

|   |              |              |              |
|---|--------------|--------------|--------------|
| N | 0.0000000000 | 0.0000000000 | 1.8193710831 |
| N | 0.0000000000 | 0.0000000000 | 2.9180376946 |

$E(N_2 \square HCl) = -569.76293294$  au

**$N_2 \square HBr$**

|    |              |              |               |
|----|--------------|--------------|---------------|
| Br | 0.0000000000 | 0.0000000000 | -1.1629249982 |
| H  | 0.0000000000 | 0.0000000000 | 0.2552232652  |
| N  | 0.0000000000 | 0.0000000000 | 2.7585128364  |
| N  | 0.0000000000 | 0.0000000000 | 3.8572574247  |

$E(N_2 \square HBr) = -525.71563388$  au

**$N_2 \square HI$**

|   |              |              |               |
|---|--------------|--------------|---------------|
| I | 0.0000000000 | 0.0000000000 | -0.8855240524 |
| H | 0.0000000000 | 0.0000000000 | 0.7282246751  |
| N | 0.0000000000 | 0.0000000000 | 3.4165153286  |
| N | 0.0000000000 | 0.0000000000 | 4.5154323304  |

$E(N_2 \square HI) = -404.83974022$  au

**$N_2 \square HCN$**

|   |              |              |               |
|---|--------------|--------------|---------------|
| N | 0.0000000000 | 0.0000000000 | -1.3722450524 |
| C | 0.0000000000 | 0.0000000000 | -0.2169612492 |
| H | 0.0000000000 | 0.0000000000 | 0.8511397654  |
| N | 0.0000000000 | 0.0000000000 | 3.3414037302  |
| N | 0.0000000000 | 0.0000000000 | 4.4400774247  |

$E(N_2 \square HCN) = -202.70652732$  au

**$N_2 \square HCCH$**

|   |              |              |               |
|---|--------------|--------------|---------------|
| H | 0.0000000000 | 0.0000000000 | -4.1001357383 |
| C | 0.0000000000 | 0.0000000000 | -3.0370556549 |
| C | 0.0000000000 | 0.0000000000 | -1.8314597384 |
| H | 0.0000000000 | 0.0000000000 | -0.7675774582 |
| N | 0.0000000000 | 0.0000000000 | 1.8503734208  |
| N | 0.0000000000 | 0.0000000000 | 2.9492236801  |

$E(N_2 \square HCCH) = -186.61297970$  au

**$N_2 \square HCP$**

|   |              |              |               |
|---|--------------|--------------|---------------|
| P | 0.0000000000 | 0.0000000000 | -4.2524717379 |
| C | 0.0000000000 | 0.0000000000 | -2.7091182432 |
| H | 0.0000000000 | 0.0000000000 | -1.6368264192 |
| N | 0.0000000000 | 0.0000000000 | 0.9962814555  |
| N | 0.0000000000 | 0.0000000000 | 2.0951746548  |

$E(N_2 \square HCP) = -488.90892677$

**$PN \square HX$**

**$PN \square HF$**

|   |              |              |               |
|---|--------------|--------------|---------------|
| F | 0.0000000000 | 0.0000000000 | -1.4160585635 |
| H | 0.0000000000 | 0.0000000000 | -0.4834849492 |
| N | 0.0000000000 | 0.0000000000 | 1.3390678417  |
| P | 0.0000000000 | 0.0000000000 | 2.8257604504  |

$E(PN \square HF) = -495.96002431$  au

**PN□HCl**

|    |              |              |               |
|----|--------------|--------------|---------------|
| Cl | 0.0000000000 | 0.0000000000 | -2.7418581565 |
| H  | 0.0000000000 | 0.0000000000 | -1.4531192391 |
| N  | 0.0000000000 | 0.0000000000 | 0.5655962399  |
| P  | 0.0000000000 | 0.0000000000 | 2.0546659350  |

$E(\text{PN}\square\text{HCl}) = -855.93799719 \text{ au}$

**PN□HBr**

|    |              |              |               |
|----|--------------|--------------|---------------|
| Br | 0.0000000000 | 0.0000000000 | -2.3501742930 |
| H  | 0.0000000000 | 0.0000000000 | -0.9202416150 |
| N  | 0.0000000000 | 0.0000000000 | 1.1530188006  |
| P  | 0.0000000000 | 0.0000000000 | 2.6426818868  |

$E(\text{PN}\square\text{HBr}) = -811.88982365 \text{ au}$

**PN□HI**

|   |              |              |               |
|---|--------------|--------------|---------------|
| I | 0.0000000000 | 0.0000000000 | -2.5627807765 |
| H | 0.0000000000 | 0.0000000000 | -0.9410651943 |
| N | 0.0000000000 | 0.0000000000 | 1.2792138602  |
| P | 0.0000000000 | 0.0000000000 | 2.7699168900  |

$E(\text{PN}\square\text{HI}) = -691.01242324 \text{ au}$

**PN□HCN**

|   |              |              |               |
|---|--------------|--------------|---------------|
| N | 0.0000000000 | 0.0000000000 | -1.2524906379 |
| C | 0.0000000000 | 0.0000000000 | -0.0966248576 |
| H | 0.0000000000 | 0.0000000000 | 0.9783783456  |
| N | 0.0000000000 | 0.0000000000 | 3.1593785691  |
| P | 0.0000000000 | 0.0000000000 | 4.6490990532  |

$E(\text{PN}\square\text{HCN}) = -488.88169132 \text{ au}$

**PN□HCCH**

|   |              |              |               |
|---|--------------|--------------|---------------|
| H | 0.0000000000 | 0.0000000000 | -4.0202130294 |
| C | 0.0000000000 | 0.0000000000 | -2.9573008465 |
| C | 0.0000000000 | 0.0000000000 | -1.7506728193 |
| H | 0.0000000000 | 0.0000000000 | -0.6825090632 |
| N | 0.0000000000 | 0.0000000000 | 1.6608111049  |
| P | 0.0000000000 | 0.0000000000 | 3.1519514751  |

$E(\text{PN}\square\text{HCCH}) = -472.78490997 \text{ au}$

**PN□HCP**

|   |              |              |               |
|---|--------------|--------------|---------------|
| P | 0.0000000000 | 0.0000000000 | -3.3032263478 |
| C | 0.0000000000 | 0.0000000000 | -1.7583637220 |
| H | 0.0000000000 | 0.0000000000 | -0.6823348598 |
| N | 0.0000000000 | 0.0000000000 | 1.6690848286  |
| P | 0.0000000000 | 0.0000000000 | 3.1603207985  |

$E(\text{PN}\square\text{HCP}) = -775.08086196$

**OCO□HX****OCO□HF**

|   |              |              |               |
|---|--------------|--------------|---------------|
| F | 0.0000000000 | 0.0000000000 | -2.1005809452 |
| H | 0.0000000000 | 0.0000000000 | -1.1802895155 |
| O | 0.0000000000 | 0.0000000000 | 0.8025477134  |
| C | 0.0000000000 | 0.0000000000 | 1.9661400735  |

|   |              |              |              |
|---|--------------|--------------|--------------|
| O | 0.0000000000 | 0.0000000000 | 3.1239105721 |
|---|--------------|--------------|--------------|

$E(\text{OCO}\square\text{HF}) = -288.76134746 \text{ au}$

**OCO□HCl**

|    |              |              |               |
|----|--------------|--------------|---------------|
| Cl | 0.0000000000 | 0.0000000000 | -2.7147884738 |
| H  | 0.0000000000 | 0.0000000000 | -1.4384339318 |
| O  | 0.0000000000 | 0.0000000000 | 0.7847950750  |
| C  | 0.0000000000 | 0.0000000000 | 1.9480992437  |
| O  | 0.0000000000 | 0.0000000000 | 3.1073264458  |

$E(\text{OCO}\square\text{HCl}) = -648.74256446 \text{ au}$

**OCO□HBr**

|    |              |              |               |
|----|--------------|--------------|---------------|
| Br | 0.0000000000 | 0.0000000000 | -2.9506279974 |
| H  | 0.0000000000 | 0.0000000000 | -1.5321522723 |
| O  | 0.0000000000 | 0.0000000000 | 0.7818619650  |
| C  | 0.0000000000 | 0.0000000000 | 1.9449958667  |
| O  | 0.0000000000 | 0.0000000000 | 3.1047092707  |

$E(\text{OCO}\square\text{HBr}) = -604.69518604 \text{ au}$

**OCO□HI**

|   |              |              |               |
|---|--------------|--------------|---------------|
| I | 0.0000000000 | 0.0000000000 | -3.2809884449 |
| H | 0.0000000000 | 0.0000000000 | -1.6671156244 |
| O | 0.0000000000 | 0.0000000000 | 0.7866996261  |
| C | 0.0000000000 | 0.0000000000 | 1.9495844625  |
| O | 0.0000000000 | 0.0000000000 | 3.1098870832  |

$E(\text{OCO}\square\text{HI}) = -483.81916127 \text{ au}$

**OCO□HCN**

|   |              |              |               |
|---|--------------|--------------|---------------|
| N | 0.0000000000 | 0.0000000000 | -3.7858006664 |
| C | 0.0000000000 | 0.0000000000 | -2.6304607765 |
| H | 0.0000000000 | 0.0000000000 | -1.5620014526 |
| O | 0.0000000000 | 0.0000000000 | 0.7078105727  |
| C | 0.0000000000 | 0.0000000000 | 1.8717241532  |
| O | 0.0000000000 | 0.0000000000 | 3.0304265285  |

$E(\text{OCO}\square\text{HCN}) = -281.68647853 \text{ au}$

**OCO□HCCH**

|   |              |              |               |
|---|--------------|--------------|---------------|
| H | 0.0000000000 | 0.0000000000 | -4.9607442480 |
| C | 0.0000000000 | 0.0000000000 | -3.8976983535 |
| C | 0.0000000000 | 0.0000000000 | -2.6919738022 |
| H | 0.0000000000 | 0.0000000000 | -1.6277593772 |
| O | 0.0000000000 | 0.0000000000 | 0.7761330810  |
| C | 0.0000000000 | 0.0000000000 | 1.9388576718  |
| O | 0.0000000000 | 0.0000000000 | 3.0991611652  |

$E(\text{OCO}\square\text{HCCH}) = -265.59240156 \text{ au}$

**OCO□HCP**

|   |              |              |               |
|---|--------------|--------------|---------------|
| P | 0.0000000000 | 0.0000000000 | -4.2494771117 |
| C | 0.0000000000 | 0.0000000000 | -2.7058942686 |
| H | 0.0000000000 | 0.0000000000 | -1.6333426269 |
| O | 0.0000000000 | 0.0000000000 | 0.7899373635  |
| C | 0.0000000000 | 0.0000000000 | 1.9527151499  |

|   |              |              |              |
|---|--------------|--------------|--------------|
| O | 0.0000000000 | 0.0000000000 | 3.1130605192 |
|---|--------------|--------------|--------------|

$E(\text{OCO}\square\text{HCP}) = -567.88834926 \text{ au}$

### SCO□HX

#### SCO□HF

|   |              |              |               |
|---|--------------|--------------|---------------|
| F | 0.0000000000 | 0.0000000000 | -2.9036463599 |
| H | 0.0000000000 | 0.0000000000 | -1.9829541535 |
| O | 0.0000000000 | 0.0000000000 | -0.0112674477 |
| C | 0.0000000000 | 0.0000000000 | 1.1501098219  |
| S | 0.0000000000 | 0.0000000000 | 2.7071981391  |

$E(\text{SCO}\square\text{HF}) = -611.34363959 \text{ au}$

#### SCO□HCl

|    |              |              |               |
|----|--------------|--------------|---------------|
| Cl | 0.0000000000 | 0.0000000000 | -3.4853323128 |
| H  | 0.0000000000 | 0.0000000000 | -2.2086873647 |
| O  | 0.0000000000 | 0.0000000000 | 0.0020080877  |
| C  | 0.0000000000 | 0.0000000000 | 1.1624167190  |
| S  | 0.0000000000 | 0.0000000000 | 2.7220348709  |

$E(\text{SCO}\square\text{HCl}) = -971.32478720 \text{ au}$

#### SCO□HBr

|    |              |              |               |
|----|--------------|--------------|---------------|
| Br | 0.0000000000 | 0.0000000000 | -3.7243917554 |
| H  | 0.0000000000 | 0.0000000000 | -2.3056646325 |
| O  | 0.0000000000 | 0.0000000000 | -0.0044755745 |
| C  | 0.0000000000 | 0.0000000000 | 1.1555993857  |
| S  | 0.0000000000 | 0.0000000000 | 2.7160048895  |

$E(\text{SCO}\square\text{HBr}) = -927.27740161 \text{ au}$

#### SCO□HI

|   |              |              |               |
|---|--------------|--------------|---------------|
| I | 0.0000000000 | 0.0000000000 | -4.0551378154 |
| H | 0.0000000000 | 0.0000000000 | -2.4410915777 |
| O | 0.0000000000 | 0.0000000000 | -0.0022096011 |
| C | 0.0000000000 | 0.0000000000 | 1.1573574707  |
| S | 0.0000000000 | 0.0000000000 | 2.7188455916  |

$E(\text{SCO}\square\text{HI}) = -806.40136189$

#### SCO□HCN

|   |              |              |               |
|---|--------------|--------------|---------------|
| N | 0.0000000000 | 0.0000000000 | -4.4956032679 |
| C | 0.0000000000 | 0.0000000000 | -3.3402328721 |
| H | 0.0000000000 | 0.0000000000 | -2.2715300071 |
| O | 0.0000000000 | 0.0000000000 | -0.0122131353 |
| C | 0.0000000000 | 0.0000000000 | 1.1489782685  |
| S | 0.0000000000 | 0.0000000000 | 2.7077010139  |

$E(\text{SCO}\square\text{HCN}) = -604.26878026 \text{ au}$

#### SCO□HCCH

|   |              |              |               |
|---|--------------|--------------|---------------|
| H | 0.0000000000 | 0.0000000000 | -5.0151384308 |
| C | 0.0000000000 | 0.0000000000 | -3.9521101617 |
| C | 0.0000000000 | 0.0000000000 | -2.7463522474 |
| H | 0.0000000000 | 0.0000000000 | -1.6820348030 |
| O | 0.0000000000 | 0.0000000000 | 0.7170929005  |
| C | 0.0000000000 | 0.0000000000 | 1.8764777740  |



|   |              |              |              |
|---|--------------|--------------|--------------|
| S | 0.0000000000 | 0.0000000000 | 3.4380411055 |
|---|--------------|--------------|--------------|

$E(\text{SCO}\square\text{HCCH}) = -588.17453882 \text{ au}$

**SCO□HCP**

|   |              |              |               |
|---|--------------|--------------|---------------|
| P | 0.0000000000 | 0.0000000000 | -5.0433396370 |
| C | 0.0000000000 | 0.0000000000 | -3.4997006984 |
| H | 0.0000000000 | 0.0000000000 | -2.4270596393 |
| O | 0.0000000000 | 0.0000000000 | -0.0098620407 |
| C | 0.0000000000 | 0.0000000000 | 1.1495784945  |
| S | 0.0000000000 | 0.0000000000 | 2.7112596681  |

$E(\text{SCO}\square\text{HCP}) = -890.47051893 \text{ au}$

**HB□HX**

**HB□HF**

|   |              |              |               |
|---|--------------|--------------|---------------|
| F | 0.0000000000 | 0.0000000000 | -2.3568625499 |
| H | 0.0000000000 | 0.0000000000 | -1.4201237381 |
| B | 0.0000000000 | 0.0000000000 | 0.6362002508  |
| H | 0.0000000000 | 0.0000000000 | 1.8537166365  |

$E(\text{HB}\square\text{HF}) = -125.61980187 \text{ au}$

**HB□HCl**

|    |              |              |               |
|----|--------------|--------------|---------------|
| Cl | 0.0000000000 | 0.0000000000 | -1.9728969272 |
| H  | 0.0000000000 | 0.0000000000 | -0.6779899909 |
| B  | 0.0000000000 | 0.0000000000 | 1.5715067465  |
| H  | 0.0000000000 | 0.0000000000 | 2.7936732651  |

$E(\text{HB}\square\text{HCl}) = -485.59782029 \text{ au}$

**HB□HBr**

|    |              |              |               |
|----|--------------|--------------|---------------|
| Br | 0.0000000000 | 0.0000000000 | -3.0760381092 |
| H  | 0.0000000000 | 0.0000000000 | -1.6368848855 |
| B  | 0.0000000000 | 0.0000000000 | 0.6279907637  |
| H  | 0.0000000000 | 0.0000000000 | 1.8512686605  |

$E(\text{HB}\square\text{HBr}) = -441.54991866 \text{ au}$

**HB□HI**

|   |              |              |               |
|---|--------------|--------------|---------------|
| I | 0.0000000000 | 0.0000000000 | -3.4002869071 |
| H | 0.0000000000 | 0.0000000000 | -1.7710805256 |
| B | 0.0000000000 | 0.0000000000 | 0.6557469451  |
| H | 0.0000000000 | 0.0000000000 | 1.8815180968  |

$E(\text{HB}\square\text{HI}) = -320.67240670 \text{ au}$

**HB□HCN**

|   |              |              |               |
|---|--------------|--------------|---------------|
| N | 0.0000000000 | 0.0000000000 | -4.0740519667 |
| C | 0.0000000000 | 0.0000000000 | -2.9181884654 |
| H | 0.0000000000 | 0.0000000000 | -1.8430702749 |
| B | 0.0000000000 | 0.0000000000 | 0.7198849949  |
| H | 0.0000000000 | 0.0000000000 | 1.9434754661  |

$E(\text{HB}\square\text{HCN}) = -118.54023338 \text{ au}$

**HB□HCCH**

|   |              |              |               |
|---|--------------|--------------|---------------|
| H | 0.0000000000 | 0.0000000000 | -5.3553391268 |
| C | 0.0000000000 | 0.0000000000 | -4.2923743037 |
| C | 0.0000000000 | 0.0000000000 | -3.0858915319 |

|   |              |              |               |
|---|--------------|--------------|---------------|
| H | 0.0000000000 | 0.0000000000 | -2.0179386208 |
| B | 0.0000000000 | 0.0000000000 | 0.7260543070  |
| H | 0.0000000000 | 0.0000000000 | 1.9542754554  |

$E(\text{HB}\square\text{HCCH}) = -102.44425577 \text{ au}$

**HB□HCP**

|   |              |              |               |
|---|--------------|--------------|---------------|
| P | 0.0000000000 | 0.0000000000 | -4.5442489655 |
| C | 0.0000000000 | 0.0000000000 | -2.9995678981 |
| H | 0.0000000000 | 0.0000000000 | -1.9235451863 |
| B | 0.0000000000 | 0.0000000000 | 0.8217156745  |
| H | 0.0000000000 | 0.0000000000 | 2.0500011142  |

$E(\text{HB}\square\text{HCP}) = -404.74021411 \text{ au}$

**FB□HX**

**FB□HF**

|   |              |              |               |
|---|--------------|--------------|---------------|
| F | 0.0000000000 | 0.0000000000 | -2.3419078412 |
| H | 0.0000000000 | 0.0000000000 | -1.4137635638 |
| B | 0.0000000000 | 0.0000000000 | 0.7386020043  |
| F | 0.0000000000 | 0.0000000000 | 1.9966525679  |

$E(\text{FB}\square\text{HF}) = -224.91931989 \text{ au}$

**FB□HCl**

|    |              |              |               |
|----|--------------|--------------|---------------|
| Cl | 0.0000000000 | 0.0000000000 | -2.0325327054 |
| H  | 0.0000000000 | 0.0000000000 | -0.7486571194 |
| B  | 0.0000000000 | 0.0000000000 | 1.6389829182  |
| F  | 0.0000000000 | 0.0000000000 | 2.9000636589  |

$E(\text{FB}\square\text{HCl}) = -584.89892220 \text{ au}$

**FB□HBr**

|    |              |              |               |
|----|--------------|--------------|---------------|
| Br | 0.0000000000 | 0.0000000000 | -3.1552283884 |
| H  | 0.0000000000 | 0.0000000000 | -1.7293745211 |
| B  | 0.0000000000 | 0.0000000000 | 0.7167393390  |
| F  | 0.0000000000 | 0.0000000000 | 1.9784990017  |

$E(\text{FB}\square\text{HBr}) = -540.85126520 \text{ au}$

**FB□HI**

|   |              |              |               |
|---|--------------|--------------|---------------|
| I | 0.0000000000 | 0.0000000000 | -3.4874568267 |
| H | 0.0000000000 | 0.0000000000 | -1.8685716875 |
| B | 0.0000000000 | 0.0000000000 | 0.7522261234  |
| F | 0.0000000000 | 0.0000000000 | 2.0154378221  |

$E(\text{FB}\square\text{HI}) = -419.97457059 \text{ au}$

**FB□HCN**

|   |              |              |               |
|---|--------------|--------------|---------------|
| N | 0.0000000000 | 0.0000000000 | -4.0987700695 |
| C | 0.0000000000 | 0.0000000000 | -2.9431869928 |
| H | 0.0000000000 | 0.0000000000 | -1.8716763296 |
| B | 0.0000000000 | 0.0000000000 | 0.7620831460  |
| F | 0.0000000000 | 0.0000000000 | 2.0234425040  |

$E(\text{HB}\square\text{HCN}) = -217.84204527 \text{ au}$

**FB□HCCH**

|   |              |              |               |
|---|--------------|--------------|---------------|
| H | 0.0000000000 | 0.0000000000 | -5.3725963617 |
| C | 0.0000000000 | 0.0000000000 | -4.3095855543 |
| C | 0.0000000000 | 0.0000000000 | -3.1035453488 |
| H | 0.0000000000 | 0.0000000000 | -2.0376481290 |
| B | 0.0000000000 | 0.0000000000 | 0.7642615729  |
| F | 0.0000000000 | 0.0000000000 | 2.0284060788  |

$E(\text{FB}\square\text{HCCH}) = -102.44425577 \text{ au}$

**FB□HCP**

|   |              |              |               |
|---|--------------|--------------|---------------|
| P | 0.0000000000 | 0.0000000000 | -4.5663794175 |
| C | 0.0000000000 | 0.0000000000 | -3.0224862528 |
| H | 0.0000000000 | 0.0000000000 | -1.9483544177 |
| B | 0.0000000000 | 0.0000000000 | 0.8589748268  |
| F | 0.0000000000 | 0.0000000000 | 2.1231375192  |

$E(\text{FB}\square\text{HCP}) = -504.04316286 \text{ au}$

**H<sub>3</sub>CB□HX**

**H<sub>3</sub>CB□HF**

|   |               |               |               |
|---|---------------|---------------|---------------|
| C | 0.0000000000  | 0.0000000000  | -2.1277187379 |
| H | 0.5142564297  | -0.8907182644 | -2.5031520460 |
| H | -1.0285128595 | 0.0000000000  | -2.5031520460 |
| H | 0.5142564297  | 0.8907182644  | -2.5031520460 |
| B | 0.0000000000  | 0.0000000000  | -0.5990038590 |
| H | -0.0000000000 | 0.0000000000  | 1.4244044731  |
| F | -0.0000000000 | 0.0000000000  | 2.3655997374  |

$E(\text{H}_3\text{CB}\square\text{HF}) = -164.90618891 \text{ au}$

**H<sub>3</sub>CB□HCl**

|    |               |               |               |
|----|---------------|---------------|---------------|
| C  | -0.0000561882 | 0.0000000000  | -1.9877346482 |
| H  | 0.5142854898  | -0.8908084615 | -2.3632081957 |
| H  | -1.0286744329 | 0.0000000000  | -2.3633311150 |
| H  | 0.5142854898  | 0.8908084615  | -2.3632081957 |
| B  | -0.0000439439 | 0.0000000000  | -0.4557146592 |
| H  | 0.0002388253  | 0.0000000000  | 1.7201639491  |
| Cl | -0.0000352401 | 0.0000000000  | 3.0235583404  |

$E(\text{H}_3\text{CB}\square\text{HCl}) = -524.88370145 \text{ au}$

**H<sub>3</sub>CB□HBr**

|    |               |               |               |
|----|---------------|---------------|---------------|
| C  | -0.0000000001 | 0.0000000000  | -1.8964752276 |
| H  | 0.5143740300  | -0.8909219540 | -2.2717491065 |
| H  | -1.0287480600 | 0.0000000000  | -2.2717491066 |
| H  | 0.5143740300  | 0.8909219540  | -2.2717491065 |
| B  | 0.0000000000  | 0.0000000000  | -0.3645341400 |
| H  | 0.0000000000  | 0.0000000000  | 1.7910011160  |
| Br | 0.0000000000  | 0.0000000000  | 3.2431810469  |

$E(\text{H}_3\text{CB}\square\text{HBr}) = -480.83163401 \text{ au}$

**H<sub>3</sub>CB□HI**

|   |               |               |               |
|---|---------------|---------------|---------------|
| C | 0.0000000000  | 0.0000000000  | -1.9697264893 |
| H | 0.5143995647  | -0.8909661815 | -2.3453774175 |
| H | -1.0287991295 | 0.0000000000  | -2.3453774174 |
| H | 0.5143995647  | 0.8909661815  | -2.3453774175 |

|   |              |             |               |
|---|--------------|-------------|---------------|
| B | 0.000000001  | 0.000000000 | -0.4352665569 |
| H | 0.000000001  | 0.000000000 | 1.8495089219  |
| I | -0.000000001 | 0.000000000 | 3.4910418524  |

$E(\text{H}_3\text{CB}\square\text{HI}) = -359.95346460 \text{ au}$

### H<sub>3</sub>CB□HCN

|   |               |               |               |
|---|---------------|---------------|---------------|
| B | 0.0082025774  | 0.000000000   | 0.0021406062  |
| C | 1.5420933140  | 0.000000000   | 0.0002281945  |
| H | 1.9197570345  | 0.000000000   | 1.0281742804  |
| H | 1.9178388080  | -0.8906026434 | -0.5144221203 |
| H | 1.9178388080  | 0.8906026434  | -0.5144221203 |
| H | -2.5105171147 | 0.000000000   | -0.0020071487 |
| C | -3.5881764073 | 0.000000000   | -0.0006005021 |
| N | -4.7442630200 | 0.000000000   | 0.0009088104  |

$E(\text{H}_3\text{CB}\square\text{HCN}) = -157.82582407\text{au}$

### H<sub>3</sub>CB□HCCH

|   |               |               |               |
|---|---------------|---------------|---------------|
| C | 0.000000000   | 0.000000000   | -2.0878671089 |
| H | 0.5142431289  | -0.8906952266 | -2.4640345220 |
| H | -1.0284862578 | 0.000000000   | -2.4640345219 |
| H | 0.5142431289  | 0.8906952266  | -2.4640345220 |
| B | 0.000000001   | 0.000000000   | -0.5490004453 |
| H | 0.000000000   | 0.000000000   | 2.1591300595  |
| C | -0.000000001  | 0.000000000   | 3.2285275980  |
| C | 0.000000000   | 0.000000000   | 4.4353305856  |
| H | 0.000000001   | 0.000000000   | 5.4982386277  |

$E(\text{H}_3\text{CB}\square\text{HCCH}) = -141.72883466 \text{ au}$

### H<sub>3</sub>CB□HCP

|   |               |               |               |
|---|---------------|---------------|---------------|
| B | 0.0155766041  | 0.000000000   | -0.0003094171 |
| C | 1.5542194629  | 0.000000000   | -0.0004274631 |
| H | 1.9305126584  | 0.000000000   | 1.0280671431  |
| H | 1.9303954792  | -0.8906965200 | -0.5146917998 |
| H | 1.9303954792  | 0.8906965200  | -0.5146917998 |
| H | -2.6869005508 | 0.000000000   | 0.0047253318  |
| C | -3.7643501110 | 0.000000000   | 0.0011953767  |
| P | -5.3095520220 | 0.000000000   | -0.0038673719 |

$E(\text{H}_3\text{CB}\square\text{HCP}) = -444.02484476 \text{ au}$

## Oxirene□HX

### Oxirene□HF

|   |               |               |               |
|---|---------------|---------------|---------------|
| O | 0.000000000   | -0.0455850982 | 0.0586572810  |
| C | 0.6341857444  | 1.3126835802  | -0.0368627688 |
| C | -0.6341857444 | 1.3126835802  | -0.0368627688 |
| H | 1.6566627257  | 1.6248774549  | -0.0634088556 |
| H | -1.6566627257 | 1.6248774549  | -0.0634088556 |
| H | 0.000000000   | -0.7004575036 | -1.4403875455 |
| F | 0.000000000   | -0.9466794683 | -2.3517264868 |

$E(\text{oxirene}\square\text{HF}) = -252.66790085 \text{ au}$

### Oxirene□HCl

|    |               |               |               |
|----|---------------|---------------|---------------|
| O  | 0.0000000000  | -0.0605010955 | 0.0550279629  |
| C  | 0.6342572804  | 1.2963999206  | -0.0491315015 |
| C  | -0.6342572804 | 1.2963999206  | -0.0491315015 |
| H  | 1.6560979385  | 1.6107845043  | -0.0792459814 |
| H  | -1.6560979385 | 1.6107845043  | -0.0792459814 |
| H  | 0.0000000000  | -0.6739436908 | -1.5443425853 |
| Cl | 0.0000000000  | -0.8975240635 | -2.8362039250 |

$E(\text{oxirene} \square \text{HCl}) = -612.64576208 \text{ au}$

#### Oxirene $\square$ HBr

|    |               |               |               |
|----|---------------|---------------|---------------|
| O  | 0.0000000000  | -0.0995626710 | 0.0284140696  |
| C  | 0.6361838756  | 1.2654460237  | -0.0887266942 |
| C  | -0.6361838756 | 1.2654460237  | -0.0887266942 |
| H  | 1.6586483949  | 1.5765248238  | -0.1229653731 |
| H  | -1.6586483949 | 1.5765248238  | -0.1229653731 |
| H  | 0.0000000000  | -0.6067443938 | -1.4573083381 |
| Br | 0.0000000000  | -0.7952346301 | -2.9299951101 |

$E(\text{oxirene} \square \text{HBr}) = -568.58598638 \text{ au}$

#### Oxirene $\square$ HI

|   |               |               |               |
|---|---------------|---------------|---------------|
| O | 0.0000000000  | -0.0540432971 | 0.0812103231  |
| C | 0.6344518819  | 1.2986810312  | -0.0477666955 |
| C | -0.6344518819 | 1.2986810312  | -0.0477666955 |
| H | 1.6556483468  | 1.6150181191  | -0.0810692426 |
| H | -1.6556483468 | 1.6150181191  | -0.0810692426 |
| H | 0.0000000000  | -0.7092125593 | -1.5480585313 |
| I | 0.0000000000  | -0.9865078140 | -3.1777583187 |

$E(\text{oxirene} \square \text{HI}) = -447.70807635 \text{ au}$

#### Oxirene $\square$ HCN

|   |               |               |               |
|---|---------------|---------------|---------------|
| O | 0.0000000000  | -0.1326992225 | 0.0720255439  |
| C | 0.6345236957  | 1.2050640629  | -0.1710832241 |
| C | -0.6345236957 | 1.2050640629  | -0.1710832241 |
| H | 1.6543769226  | 1.5245798285  | -0.2154446540 |
| H | -1.6543769226 | 1.5245798285  | -0.2154446540 |
| H | 0.0000000000  | -1.0325241165 | -1.6557901190 |
| C | 0.0000000000  | -1.3019369161 | -2.7037267705 |
| N | 0.0000000000  | -1.5719085027 | -3.8280148489 |

$E(\text{oxirene} \square \text{HCN}) = -245.58738797 \text{ au}$

#### Oxirene $\square$ HCCH

|   |               |               |               |
|---|---------------|---------------|---------------|
| O | 0.0000000000  | -0.0939174903 | 0.2181179880  |
| C | 0.6345849717  | 1.2011100004  | -0.1881672104 |
| C | -0.6345849717 | 1.2011100004  | -0.1881672104 |
| H | 1.6534137714  | 1.5100586835  | -0.2873005565 |
| H | -1.6534137714 | 1.5100586835  | -0.2873005565 |
| H | 0.0000000000  | -1.1226477713 | -1.6159227369 |
| C | 0.0000000000  | -1.3247384669 | -2.6688926063 |
| C | 0.0000000000  | -1.5468235887 | -3.8553441027 |
| H | 0.0000000000  | -1.7462910257 | -4.8995849591 |

$E(\text{oxirene} \square \text{HCCH}) = -229.49056285 \text{ au}$

#### Oxirene $\square$ HCP

|   |               |               |               |
|---|---------------|---------------|---------------|
| O | 0.0000000000  | -0.0887916484 | 0.2359763993  |
| C | 0.6346043971  | 1.1923481463  | -0.2115021470 |
| C | -0.6346043971 | 1.1923481463  | -0.2115021470 |
| H | 1.6534261033  | 1.4988398010  | -0.3193336345 |
| H | -1.6534261033 | 1.4988398010  | -0.3193336345 |
| H | 0.0000000000  | -1.1726030262 | -1.5800521340 |
| C | 0.0000000000  | -1.3841428408 | -2.6386194432 |
| P | 0.0000000000  | -1.6750653610 | -4.1563531895 |

$E(\text{oxirene} \cdots \text{HCP}) = -531.78639217 \text{ au}$

### $(\text{CH}_3)_2\text{O} \cdots \text{HX}$

#### $(\text{CH}_3)_2\text{O} \cdots \text{HF}$

|   |               |               |               |
|---|---------------|---------------|---------------|
| O | 0.0000000000  | 0.0831917191  | 0.0622398212  |
| C | 1.1751910228  | -0.0051675218 | -0.7272609077 |
| C | -1.1751910228 | -0.0051675218 | -0.7272609077 |
| H | 2.0239751335  | 0.0567031883  | -0.0513606963 |
| H | -2.0239751335 | 0.0567031883  | -0.0513606963 |
| H | 1.2071784119  | -0.9542893963 | -1.2701021376 |
| H | 1.2135882624  | 0.8207277395  | -1.4422658837 |
| H | -1.2135882624 | 0.8207277395  | -1.4422658837 |
| H | -1.2071784119 | -0.9542893963 | -1.2701021376 |
| H | 0.0000000000  | -0.8864679121 | 1.3954539481  |
| F | 0.0000000000  | -1.4794277591 | 2.1251381504  |

$E[(\text{CH}_3)_2\text{O} \cdots \text{HF}] = -255.21202946 \text{ au}$

#### $(\text{CH}_3)_2\text{O} \cdots \text{HCl}$

|    |               |               |               |
|----|---------------|---------------|---------------|
| O  | 0.0000000000  | 0.2096202745  | 0.0495077200  |
| C  | 1.1723705824  | 0.0244516484  | -0.7256937352 |
| C  | -1.1723705824 | 0.0244516484  | -0.7256937352 |
| H  | 2.0235540526  | 0.1662401374  | -0.0645403082 |
| H  | -2.0235540526 | 0.1662401374  | -0.0645403082 |
| H  | 1.2033935123  | -0.9842289954 | -1.1491414991 |
| H  | -1.2033935123 | -0.9842289954 | -1.1491414991 |
| H  | 1.2128392763  | 0.7562687850  | -1.5371419107 |
| H  | -1.2128392763 | 0.7562687850  | -1.5371419107 |
| H  | 0.0000000000  | -0.8996246925 | 1.4169563244  |
| Cl | 0.0000000000  | -1.8251787328 | 2.3339508621  |

$E[(\text{CH}_3)_2\text{O} \cdots \text{HCl}] = -615.18959577 \text{ au}$

#### $(\text{CH}_3)_2\text{O} \cdots \text{HBr}$

|    |               |               |               |
|----|---------------|---------------|---------------|
| O  | 0.0000000000  | 0.3158007004  | 0.0427870720  |
| C  | 1.1713001479  | 0.0500479247  | -0.7114061828 |
| C  | -1.1713001479 | 0.0500479247  | -0.7114061828 |
| H  | 2.0235794514  | 0.2818739321  | -0.0776148659 |
| H  | -2.0235794514 | 0.2818739321  | -0.0776148659 |
| H  | 1.2127684731  | -1.0031632087 | -1.0070251446 |
| H  | 1.1985524583  | 0.6769094978  | -1.6070144247 |
| H  | -1.1985524583 | 0.6769094978  | -1.6070144247 |
| H  | -1.2127684731 | -1.0031632087 | -1.0070251446 |
| H  | 0.0000000000  | -0.8816430393 | 1.3628455706  |
| Br | 0.0000000000  | -2.0308997296 | 2.2422021260  |

$E[(\text{CH}_3)_2\text{O}\cdots\text{HBr}] = -571.14148978 \text{ au}$

**$(\text{CH}_3)_2\text{O}\cdots\text{HI}$**

|   |               |               |               |
|---|---------------|---------------|---------------|
| O | 0.0000000000  | 0.3482730805  | 0.0100469742  |
| C | 1.1692431969  | 0.0710657606  | -0.7394041514 |
| C | -1.1692431969 | 0.0710657606  | -0.7394041514 |
| H | 2.0229485306  | 0.3041507219  | -0.1076868706 |
| H | -2.0229485306 | 0.3041507219  | -0.1076868706 |
| H | 1.2067668401  | -0.9850102308 | -1.0274900982 |
| H | 1.2026519022  | 0.6888527940  | -1.6417080466 |
| H | -1.2026519022 | 0.6888527940  | -1.6417080466 |
| H | -1.2067668401 | -0.9850102308 | -1.0274900982 |
| H | 0.0000000000  | -0.9027241315 | 1.4264367399  |
| I | 0.0000000000  | -2.1890728170 | 2.4378081521  |

$E[(\text{CH}_3)_2\text{O}\cdots\text{HI}] = -450.26337414 \text{ au}$

**$(\text{CH}_3)_2\text{O}\cdots\text{HCN}$**

|   |               |               |               |
|---|---------------|---------------|---------------|
| O | 0.0000000000  | -0.3341828217 | -0.1766083946 |
| C | 1.1693866318  | -0.0104170036 | -0.9026036058 |
| C | -1.1693866318 | -0.0104170036 | -0.9026036058 |
| H | 2.0237211538  | -0.2846671816 | -0.2879169536 |
| H | -2.0237211538 | -0.2846671816 | -0.2879169536 |
| H | 1.2081436056  | -0.5652971249 | -1.8453365771 |
| H | 1.2082511330  | 1.0617580538  | -1.1195502188 |
| H | -1.2082511330 | 1.0617580538  | -1.1195502188 |
| H | -1.2081436056 | -0.5652971249 | -1.8453365771 |
| H | 0.0000000000  | -1.1390480566 | 1.6240176029  |
| C | 0.0000000000  | -1.5827411377 | 2.6063253534  |
| N | 0.0000000000  | -2.0586706743 | 3.6598463834  |

$E[(\text{CH}_3)_2\text{O}\cdots\text{HCN}] = -248.13210504 \text{ au}$

**$(\text{CH}_3)_2\text{O}\cdots\text{HCCH}$**

|   |               |               |               |
|---|---------------|---------------|---------------|
| O | 0.9568799660  | -0.1578871176 | 0.0000000000  |
| C | 2.1270626783  | -0.9461886407 | 0.0000000000  |
| C | 1.2618857632  | 1.2206467549  | 0.0000000000  |
| H | 1.8194782994  | -1.9892249086 | 0.0000000000  |
| H | 0.3193376077  | 1.7640985044  | 0.0000000000  |
| H | 2.7337418464  | -0.7475684149 | -0.8902890149 |
| H | 2.7337418464  | -0.7475684149 | 0.8902890149  |
| H | 1.8377793345  | 1.4945839231  | 0.8906221928  |
| H | 1.8377793345  | 1.4945839231  | -0.8906221928 |
| H | -1.1488828077 | -0.3966939719 | 0.0000000000  |
| C | -2.2051013122 | -0.2280100716 | 0.0000000000  |
| C | -3.3955382452 | -0.0295795211 | 0.0000000000  |
| H | -4.4445846715 | 0.1424700657  | 0.0000000000  |

$E[(\text{CH}_3)_2\text{O}\cdots\text{HCCH}] = -232.03543192 \text{ au}$

**$(\text{CH}_3)_2\text{O}\cdots\text{HCP}$**

|   |               |               |               |
|---|---------------|---------------|---------------|
| O | 0.0000000000  | -0.3061010328 | -0.2416547330 |
| C | 1.1665202957  | 0.0183382076  | -0.9668809976 |
| C | -1.1665202957 | 0.0183382076  | -0.9668809976 |
| H | 2.0208807179  | -0.2565896924 | -0.3524768656 |
| H | -2.0208807179 | -0.2565896924 | -0.3524768656 |

|   |               |               |               |
|---|---------------|---------------|---------------|
| H | 1.2073963473  | -0.5343985481 | -1.9117702341 |
| H | 1.2074549336  | 1.0911799934  | -1.1844550921 |
| H | -1.2074549336 | 1.0911799934  | -1.1844550921 |
| H | -1.2073963473 | -0.5343985481 | -1.9117702341 |
| H | 0.0000000000  | -1.1763491814 | 1.6996840239  |
| C | 0.0000000000  | -1.6171819029 | 2.6829764282  |
| P | 0.0000000000  | -2.2493083677 | 4.0929076170  |

$E[(\text{CH}_3)_2\text{O}\cdots\text{HCP}] = -534.33087630 \text{ au}$

## $\text{H}_2\text{C}=\text{O}\cdots\text{HX}$

### $\text{H}_2\text{C}=\text{O}\cdots\text{HF}$

|   |               |               |              |
|---|---------------|---------------|--------------|
| C | -1.3971771989 | 0.4984670407  | 0.0000000000 |
| H | -0.8380055961 | 1.4440692824  | 0.0000000000 |
| H | -2.4934274320 | 0.5514281849  | 0.0000000000 |
| O | -0.8263140077 | -0.5705997461 | 0.0000000000 |
| H | 0.8822651672  | -0.3109822909 | 0.0000000000 |
| F | 1.7364740043  | 0.0674914382  | 0.0000000000 |

$E(\text{H}_2\text{C}=\text{O}\cdots\text{HF}) = -214.75382343 \text{ au}$

### $\text{H}_2\text{C}=\text{O}\cdots\text{HCl}$

|    |               |               |              |
|----|---------------|---------------|--------------|
| C  | -1.9909703705 | 0.5383507931  | 0.0000000000 |
| H  | -1.3071858428 | 1.4001316120  | 0.0000000000 |
| H  | -3.0697793893 | 0.7460635559  | 0.0000000000 |
| O  | -1.5721730192 | -0.5973665256 | 0.0000000000 |
| H  | 0.3206570130  | -0.4584615197 | 0.0000000000 |
| Cl | 1.5096117178  | 0.0459525410  | 0.0000000000 |

$E(\text{H}_2\text{C}=\text{O}\cdots\text{HCl}) = -574.73215810 \text{ au}$

### $\text{H}_2\text{C}=\text{O}\cdots\text{HBr}$

|    |               |               |              |
|----|---------------|---------------|--------------|
| C  | -2.0007444160 | 0.5398377997  | 0.0000000000 |
| H  | -1.3155667010 | 1.4012203254  | 0.0000000000 |
| H  | -3.0792263480 | 0.7511161638  | 0.0000000000 |
| O  | -1.5844200844 | -0.5962147258 | 0.0000000000 |
| H  | 0.3450863271  | -0.4652674544 | 0.0000000000 |
| Br | 1.6854196136  | 0.0439783480  | 0.0000000000 |

$E(\text{H}_2\text{C}=\text{O}\cdots\text{HBr}) = -530.68416521 \text{ au}$

### $\text{H}_2\text{C}=\text{O}\cdots\text{HI}$

|   |               |               |              |
|---|---------------|---------------|--------------|
| C | -1.9772219557 | 0.5298909844  | 0.0000000000 |
| H | -1.2536315241 | 1.3604497606  | 0.0000000000 |
| H | -3.0449077472 | 0.7934054762  | 0.0000000000 |
| O | -1.6139030756 | -0.6231117619 | 0.0000000000 |
| H | 0.4559676232  | -0.5247807010 | 0.0000000000 |
| I | 1.9395254571  | 0.1388166984  | 0.0000000000 |

$E(\text{H}_2\text{C}=\text{O}\cdots\text{HI}) = -409.80682763 \text{ au}$

### $\text{H}_2\text{C}=\text{O}\cdots\text{HCN}$

|   |              |               |               |
|---|--------------|---------------|---------------|
| C | 0.0000000000 | -0.3151375263 | -2.4458996512 |
| H | 0.0000000000 | -1.4034843948 | -2.2836015769 |
| H | 0.0000000000 | 0.0345040280  | -3.4884672306 |
| O | 0.0000000000 | 0.4642106406  | -1.5220604116 |



|   |              |               |              |
|---|--------------|---------------|--------------|
| H | 0.0000000000 | 0.2162841268  | 0.5494620183 |
| C | 0.0000000000 | 0.0060660417  | 1.6026926399 |
| N | 0.0000000000 | -0.2325792028 | 2.7335410621 |

$E(\text{H}_2\text{C}=\text{O}\cdots\text{HCN}) = -207.67490184$  au

### **H<sub>2</sub>C=O···HCCH**

|   |              |               |               |
|---|--------------|---------------|---------------|
| C | 0.0000000000 | -0.2827152801 | -2.1062882961 |
| H | 0.0000000000 | -1.0775972563 | -1.3435463642 |
| H | 0.0000000000 | -0.6007323287 | -3.1600669274 |
| O | 0.0000000000 | 0.8858690397  | -1.8008869365 |
| H | 0.0000000000 | 0.7200871667  | 0.4180272296  |
| C | 0.0000000000 | 0.0815244326  | 1.2745158685  |
| C | 0.0000000000 | -0.6573154878 | 2.2283654107  |
| H | 0.0000000000 | -1.2992565728 | 3.0755468653  |

$E(\text{H}_2\text{C}=\text{O}\cdots\text{HCCH}) = -191.58083148$  au

### **H<sub>2</sub>C=O···HCP**

|   |              |               |               |
|---|--------------|---------------|---------------|
| C | 0.0000000000 | -0.2648111581 | -2.1417680718 |
| H | 0.0000000000 | -1.0720949032 | -1.3919023000 |
| H | 0.0000000000 | -0.5656589433 | -3.2006268692 |
| O | 0.0000000000 | 0.8986233451  | -1.8168137700 |
| H | 0.0000000000 | 0.7052868412  | 0.4455775726  |
| C | 0.0000000000 | 0.0281344142  | 1.2818818872  |
| P | 0.0000000000 | -0.9596158828 | 2.4693184011  |

$E(\text{H}_2\text{C}=\text{O}\cdots\text{HCP}) = -493.87527645$  au

### **H<sub>2</sub>C=C=O···HX**

#### **H<sub>2</sub>C=C=O···HF**

|   |               |               |               |
|---|---------------|---------------|---------------|
| C | -0.0156656717 | -0.0767269891 | 0.0000000000  |
| O | 1.1502108165  | -0.1458003261 | 0.0000000000  |
| C | -1.3223993182 | 0.0117082668  | 0.0000000000  |
| H | -1.8441860752 | 0.0416850341  | 0.9423467170  |
| H | -1.8441860752 | 0.0416850341  | -0.9423467170 |
| H | 2.2105245351  | -1.7025646867 | 0.0000000000  |
| F | 2.6612564243  | -2.5092038533 | 0.0000000000  |

$E(\text{H}_2\text{C}=\text{C}=\text{O}\cdots\text{HF}) = -252.78142966$  au

#### **H<sub>2</sub>C=C=O···HCl**

|    |               |               |               |
|----|---------------|---------------|---------------|
| C  | -0.0652285190 | 0.0401713719  | 0.0000000000  |
| O  | 1.1008621693  | 0.0511458359  | 0.0000000000  |
| C  | -1.3768470267 | 0.0325076688  | 0.0000000000  |
| H  | -1.8993453714 | 0.0251354373  | 0.9421777542  |
| H  | -1.8993453714 | 0.0251354373  | -0.9421777542 |
| H  | 2.2879078305  | -1.6806956643 | 0.0000000000  |
| Cl | 2.8471758768  | -2.8317294575 | 0.0000000000  |

$E(\text{H}_2\text{C}=\text{C}=\text{O}\cdots\text{HCl}) = -612.76176345$  au

#### **H<sub>2</sub>C=C=O···HBr**

|   |               |              |              |
|---|---------------|--------------|--------------|
| C | -0.0699407322 | 0.0959439758 | 0.0000000000 |
|---|---------------|--------------|--------------|

|    |               |               |               |
|----|---------------|---------------|---------------|
| O  | 1.0945496751  | 0.1618033704  | 0.0000000000  |
| C  | -1.3809392268 | 0.0239250466  | 0.0000000000  |
| H  | -1.9025620543 | -0.0097038560 | 0.9425474338  |
| H  | -1.9025620543 | -0.0097038560 | -0.9425474338 |
| H  | 2.3080384378  | -1.6434757355 | 0.0000000000  |
| Br | 2.8487948574  | -2.9586050407 | 0.0000000000  |

$E(\text{H}_2\text{C}=\text{C}=\text{O}\cdots\text{HBr}) = -568.71421086$  au

**$\text{H}_2\text{C}=\text{C}=\text{O}\cdots\text{HI}$**

|   |               |               |               |
|---|---------------|---------------|---------------|
| C | -0.0690983275 | 0.1518021207  | 0.0000000000  |
| O | 1.0892787008  | 0.2737804405  | 0.0000000000  |
| C | -1.3748396730 | 0.0138018755  | 0.0000000000  |
| H | -1.8941053467 | -0.0455049187 | 0.9420307295  |
| H | -1.8941053467 | -0.0455049187 | -0.9420307295 |
| H | 2.3210417802  | -1.6872555543 | 0.0000000000  |
| I | 2.8872071157  | -3.2009351403 | 0.0000000000  |

$E(\text{H}_2\text{C}=\text{C}=\text{O}\cdots\text{HI}) = -447.83786564$  au

**$\text{H}_2\text{C}=\text{C}=\text{O}\cdots\text{HCN}$**

|   |               |               |               |
|---|---------------|---------------|---------------|
| C | -0.3301740110 | -0.1029623378 | 0.0000000000  |
| O | 0.7724214888  | -0.4810102630 | 0.0000000000  |
| C | -1.5702516892 | 0.3250687690  | 0.0000000000  |
| H | -2.0644663675 | 0.4957206940  | 0.9420366412  |
| H | -2.0644663675 | 0.4957206940  | -0.9420366412 |
| H | 2.3199227083  | -2.0577978592 | 0.0000000000  |
| C | 3.0658653924  | -2.8246599974 | 0.0000000000  |
| N | 3.8696735848  | -3.6548694813 | 0.0000000000  |

$E(\text{H}_2\text{C}=\text{C}=\text{O}\cdots\text{HCN}) = -245.70564860$  au

**$\text{H}_2\text{C}=\text{C}=\text{O}\cdots\text{HCCH}$**

|   |              |               |               |
|---|--------------|---------------|---------------|
| C | 0.0000000000 | 0.0000000000  | -1.9629564149 |
| O | 0.0000000000 | 0.0000000000  | -0.7994517800 |
| C | 0.0000000000 | 0.0000000000  | -3.2765736319 |
| H | 0.0000000000 | 0.9420801329  | -3.7989134854 |
| H | 0.0000000000 | -0.9420801329 | -3.7989134854 |
| H | 0.0000000000 | 0.0000000000  | 1.5587600867  |
| C | 0.0000000000 | 0.0000000000  | 2.6235238870  |
| C | 0.0000000000 | 0.0000000000  | 3.8294179224  |
| H | 0.0000000000 | 0.0000000000  | 4.8923927614  |

$E(\text{H}_2\text{C}=\text{C}=\text{O}\cdots\text{HCCH}) = -229.61084736$  au

**$\text{H}_2\text{C}=\text{C}=\text{O}\cdots\text{HCP}$**

|   |              |               |               |
|---|--------------|---------------|---------------|
| C | 0.0000000000 | 0.0000000000  | -2.7644529825 |
| O | 0.0000000000 | 0.0000000000  | -1.6008863518 |
| C | 0.0000000000 | 0.0000000000  | -4.0780735718 |
| H | 0.0000000000 | 0.9420042350  | -4.6005850909 |
| H | 0.0000000000 | -0.9420042350 | -4.6005850909 |
| H | 0.0000000000 | 0.0000000000  | 0.7727965352  |
| C | 0.0000000000 | 0.0000000000  | 1.8457785608  |
| P | 0.0000000000 | 0.0000000000  | 3.3896197118  |

$E(\text{H}_2\text{C}=\text{C}=\text{O}\cdots\text{HCP}) = -531.90681301$  au

## H<sub>2</sub>O □ HX

### H<sub>2</sub>O □ HF

|   |               |               |               |
|---|---------------|---------------|---------------|
| H | 0.0000000000  | 0.0407699617  | 0.3709228947  |
| F | 0.0000000000  | -0.0067456336 | 1.3030326093  |
| O | 0.0000000000  | 0.0523281989  | -1.3496858648 |
| H | 0.7631047937  | -0.3676027283 | -1.7511262755 |
| H | -0.7631047937 | -0.3676027283 | -1.7511262755 |

$E(\text{H}_2\text{O} \square \text{HF}) = -176.74686032 \text{ au}$

### H<sub>2</sub>O □ HCl

|    |               |               |               |
|----|---------------|---------------|---------------|
| H  | 0.0000000000  | 0.0420145505  | -0.1895332751 |
| Cl | 0.0000000000  | -0.0033682021 | 1.0984813580  |
| O  | 0.0000000000  | 0.0472535451  | -2.1019860286 |
| H  | 0.7615813642  | -0.3370279948 | -2.5401910108 |
| H  | -0.7615813642 | -0.3370279948 | -2.5401910108 |

$E(\text{H}_2\text{O} \square \text{HCl}) = -536.72441599 \text{ au}$

### H<sub>2</sub>O □ HBr

|    |               |               |               |
|----|---------------|---------------|---------------|
| H  | 0.0000000000  | 0.0491812422  | -0.7869899812 |
| Br | 0.0000000000  | -0.0014584193 | 0.6419813900  |
| O  | 0.0000000000  | 0.0476639987  | -2.7556805117 |
| H  | 0.7611242987  | -0.3448188521 | -3.1875975299 |
| H  | -0.7611242987 | -0.3448188521 | -3.1875975299 |

$E(\text{H}_2\text{O} \square \text{HBr}) = -492.67614448 \text{ au}$

### H<sub>2</sub>O □ HI

|   |               |               |               |
|---|---------------|---------------|---------------|
| H | 0.0000000000  | 0.0376880244  | -1.1418426539 |
| I | 0.0000000000  | -0.0007823121 | 0.4790473015  |
| O | 0.0000000000  | 0.0426964115  | -3.2583747229 |
| H | 0.7601061163  | -0.3084631048 | -3.7257872467 |
| H | -0.7601061163 | -0.3084631048 | -3.7257872467 |

$E(\text{H}_2\text{O} \square \text{HI}) = -371.79866491 \text{ au}$

### H<sub>2</sub>O □ HCN

|   |               |               |               |
|---|---------------|---------------|---------------|
| N | 0.0000000000  | 0.0593680336  | 1.1546691136  |
| C | 0.0000000000  | -0.0053534964 | 0.0007467906  |
| H | 0.0000000000  | -0.0651614667 | -1.0719959108 |
| O | 0.0000000000  | -0.1677950296 | -3.1245573680 |
| H | 0.7604499900  | -0.1976439196 | -3.7068559209 |
| H | -0.7604499900 | -0.1976439196 | -3.7068559209 |

$E(\text{H}_2\text{O} \square \text{HCN}) = -169.66800457 \text{ au}$

### H<sub>2</sub>O □ HCCH

|   |               |               |               |
|---|---------------|---------------|---------------|
| H | 0.0000000000  | 0.1169579480  | 2.3157978973  |
| C | 0.0000000000  | 0.0623900842  | 1.2542441023  |
| C | 0.0000000000  | -0.0020545882 | 0.0494063768  |
| H | 0.0000000000  | -0.0579863605 | -1.0170990623 |
| O | 0.0000000000  | -0.1725279659 | -3.2133971328 |
| H | 0.7595615643  | -0.2035044580 | -3.7969006988 |
| H | -0.7595615643 | -0.2035044580 | -3.7969006988 |

$E(\text{H}_2\text{O} \square \text{HCCH}) = -153.57154086 \text{ au}$

**H<sub>2</sub>O□HCP**

|   |               |               |               |
|---|---------------|---------------|---------------|
| P | 0.0000000000  | 0.0547876112  | 1.7830442347  |
| C | 0.0000000000  | -0.0131912975 | 0.2398400601  |
| H | 0.0000000000  | -0.0622438235 | -0.8347543193 |
| O | 0.0000000000  | -0.1641404460 | -3.0463481932 |
| H | 0.7593875560  | -0.1947209213 | -3.6302349337 |
| H | -0.7593875560 | -0.1947209213 | -3.6302349337 |

 $E(\text{H}_2\text{O}\square\text{HCP}) = -455.86737442 \text{ au}$ **H<sub>2</sub>S□HX****H<sub>2</sub>S□HF**

|   |               |               |               |
|---|---------------|---------------|---------------|
| H | 0.0000000000  | 0.0499940268  | 1.1165547949  |
| F | 0.0000000000  | -0.0068387636 | 2.0430272851  |
| S | 0.0000000000  | 0.0565055049  | -1.1673964877 |
| H | 0.9665407245  | -0.8606818436 | -1.2849704274 |
| H | -0.9665407245 | -0.8606818436 | -1.2849704274 |

 $E(\text{H}_2\text{S}\square\text{HF}) = -499.33178799 \text{ au}$ **H<sub>2</sub>S□HCl**

|    |               |               |               |
|----|---------------|---------------|---------------|
| H  | 0.0000000000  | 0.0705336149  | 0.5562188546  |
| Cl | 0.0000000000  | -0.0026304987 | 1.8391613302  |
| S  | 0.0000000000  | 0.0550529082  | -1.9240131887 |
| H  | 0.9657405173  | -0.8645508751 | -2.0242073148 |
| H  | -0.9657405173 | -0.8645508751 | -2.0242073148 |

 $E(\text{H}_2\text{S}\square\text{HCl}) = -859.31181138 \text{ au}$ **H<sub>2</sub>S□HBr**

|    |               |               |               |
|----|---------------|---------------|---------------|
| H  | 0.0000000000  | 0.0454134223  | -0.2404282764 |
| Br | 0.0000000000  | -0.0010738344 | 1.1861990014  |
| S  | 0.0000000000  | 0.0553959963  | -2.7667700747 |
| H  | 0.9652490923  | -0.8611454943 | -2.8955389900 |
| H  | -0.9652490923 | -0.8611454943 | -2.8955389900 |

 $E(\text{H}_2\text{S}\square\text{HBr}) = -815.26426121 \text{ au}$ **H<sub>2</sub>S□HI**

|   |               |               |               |
|---|---------------|---------------|---------------|
| H | 0.0000000000  | 0.0440309020  | -0.7062623213 |
| I | 0.0000000000  | -0.0005443137 | 0.9137681769  |
| S | 0.0000000000  | 0.0551419496  | -3.3761294380 |
| H | 0.9651474451  | -0.8647117228 | -3.4781515645 |
| H | -0.9651474451 | -0.8647117228 | -3.4781515645 |

 $E(\text{H}_2\text{S}\square\text{HI}) = -694.38763731 \text{ au}$ **H<sub>2</sub>S□HCN**

No convergence

**H<sub>2</sub>S□HCCH**

|   |              |               |               |
|---|--------------|---------------|---------------|
| H | 0.0000000000 | -0.0440538750 | 2.7458008245  |
| C | 0.0000000000 | 0.0283400488  | 1.6851014525  |
| C | 0.0000000000 | 0.1105006243  | 0.4817389224  |
| H | 0.0000000000 | 0.1825132319  | -0.5820801771 |

|   |               |               |               |
|---|---------------|---------------|---------------|
| S | 0.0000000000  | 0.0090518883  | -3.4431502842 |
| H | 0.9646732253  | -0.9145734131 | -3.4985092712 |
| H | -0.9646732253 | -0.9145734131 | -3.4985092712 |

$E(\text{H}_2\text{S}\cdots\text{HCCH}) = -476.16013995 \text{ au}$

### $\text{H}_2\text{S}\cdots\text{HCP}$

|   |               |               |               |
|---|---------------|---------------|---------------|
| P | 0.0000000000  | 0.0452430699  | 1.9531502342  |
| C | 0.0000000000  | 0.1034398719  | 0.4102514178  |
| H | 0.0000000000  | 0.1428735827  | -0.6633866383 |
| S | 0.0000000000  | 0.0008847225  | -3.5293709848 |
| H | 0.9648907882  | -0.9176180775 | -3.6401259166 |
| H | -0.9648907882 | -0.9176180775 | -3.6401259166 |

$E(\text{H}_2\text{S}\cdots\text{HCP}) = -778.45610783 \text{ au}$

## $(\text{CH}_3)_2\text{S}\cdots\text{HX}$

### $(\text{H}_3\text{C})_2\text{S}\cdots\text{HF}$

|   |               |               |               |
|---|---------------|---------------|---------------|
| S | 0.0000000000  | -0.1056033893 | -0.0040382526 |
| C | 1.3693346285  | -0.0681858977 | -1.1757665604 |
| C | -1.3693346285 | -0.0681858977 | -1.1757665604 |
| H | 2.2922035180  | -0.1028151803 | -0.6002309487 |
| H | -2.2922035180 | -0.1028151803 | -0.6002309487 |
| H | 1.3276915102  | -0.9318509040 | -1.8380794600 |
| H | 1.3440005705  | 0.8524890974  | -1.7567143874 |
| H | -1.3440005705 | 0.8524890974  | -1.7567143874 |
| H | -1.3276915102 | -0.9318509040 | -1.8380794600 |
| H | 0.0000000000  | -2.2556577922 | 0.0683170357  |
| F | 0.0000000000  | -3.1658421037 | -0.1551614103 |

$E[(\text{H}_3\text{C})_2\text{S}\cdots\text{HF}] = -577.83023138 \text{ au}$

### $(\text{H}_3\text{C})_2\text{S}\cdots\text{HCl}$

|    |               |               |               |
|----|---------------|---------------|---------------|
| S  | 0.0000000000  | 0.0124465562  | 0.0141328733  |
| C  | 1.3668878495  | -0.0578581454 | -1.1578713729 |
| C  | -1.3668878495 | -0.0578581454 | -1.1578713729 |
| H  | 2.2912888714  | -0.0293883791 | -0.5843758284 |
| H  | -2.2912888714 | -0.0293883791 | -0.5843758284 |
| H  | 1.3294787525  | -0.9839245250 | -1.7313029632 |
| H  | 1.3355523070  | 0.7993497880  | -1.8287272897 |
| H  | -1.3355523070 | 0.7993497880  | -1.8287272897 |
| H  | -1.3294787525 | -0.9839245250 | -1.7313029632 |
| H  | 0.0000000000  | -2.2195620155 | 0.0690727507  |
| Cl | 0.0000000000  | -3.4644283553 | -0.3138462981 |

$E[(\text{H}_3\text{C})_2\text{S}\cdots\text{HCl}] = -937.81022652 \text{ au}$

### $(\text{H}_3\text{C})_2\text{S}\cdots\text{HBr}$

|   |               |               |               |
|---|---------------|---------------|---------------|
| S | 0.0000000000  | 0.0269381923  | 0.0118962322  |
| C | 1.3666947167  | -0.0508223090 | -1.1587418437 |
| C | -1.3666947167 | -0.0508223090 | -1.1587418437 |
| H | 2.2910077152  | -0.0224581392 | -0.5850098175 |
| H | -2.2910077152 | -0.0224581392 | -0.5850098175 |
| H | 1.3269234785  | -0.9799850692 | -1.7274924291 |
| H | 1.3376285543  | 0.8038424904  | -1.8328892495 |

|    |               |               |               |
|----|---------------|---------------|---------------|
| H  | -1.3376285543 | 0.8038424904  | -1.8328892495 |
| H  | -1.3269234785 | -0.9799850692 | -1.7274924291 |
| H  | 0.0000000000  | -2.1732245204 | 0.0798067046  |
| Br | 0.0000000000  | -3.5700539558 | -0.3186318400 |

$E[(\text{H}_3\text{C})_2\text{S}\cdots\text{HBr}] = -893.76305908 \text{ au}$

**(H<sub>3</sub>C)<sub>2</sub>S□HI**

|   |               |               |               |
|---|---------------|---------------|---------------|
| S | 0.0000000000  | 0.0675020740  | 0.0089628531  |
| C | 1.3661068818  | -0.0292363031 | -1.1607516799 |
| C | -1.3661068818 | -0.0292363031 | -1.1607516799 |
| H | 2.2911525800  | 0.0070675136  | -0.5885632353 |
| H | -2.2911525800 | 0.0070675136  | -0.5885632353 |
| H | 1.3256791465  | -0.9669015470 | -1.7159727220 |
| H | 1.3368387749  | 0.8145598791  | -1.8485999653 |
| H | -1.3368387749 | 0.8145598791  | -1.8485999653 |
| H | -1.3256791465 | -0.9669015470 | -1.7159727220 |
| H | 0.0000000000  | -2.1669271476 | 0.0941940361  |
| I | 0.0000000000  | -3.7667403495 | -0.3105772671 |

$E[(\text{H}_3\text{C})_2\text{S}\cdots\text{HI}] = -772.88592837 \text{ au}$

**(H<sub>3</sub>C)<sub>2</sub>S□HCN**

|   |               |               |               |
|---|---------------|---------------|---------------|
| S | 0.0000000000  | 0.1657742260  | 0.0060484894  |
| C | 1.3652821744  | -0.0267476760 | -1.1540307425 |
| C | -1.3652821744 | -0.0267476760 | -1.1540307425 |
| H | 2.2914963933  | 0.0703699448  | -0.5908531791 |
| H | -2.2914963933 | 0.0703699448  | -0.5908531791 |
| H | 1.3378192865  | -1.0076501605 | -1.6301258130 |
| H | 1.3295251286  | 0.7503748868  | -1.9162663860 |
| H | -1.3295251286 | 0.7503748868  | -1.9162663860 |
| H | -1.3378192865 | -1.0076501605 | -1.6301258130 |
| H | 0.0000000000  | -2.3259027016 | 0.2275344474  |
| C | 0.0000000000  | -3.3187170331 | -0.1918128412 |
| N | 0.0000000000  | -4.3713761010 | -0.6698028780 |

$E[(\text{H}_3\text{C})_2\text{S}\cdots\text{HCN}] = -570.75161545 \text{ au}$

**(H<sub>3</sub>C)<sub>2</sub>S□HCCH**

|   |               |               |               |
|---|---------------|---------------|---------------|
| S | -0.5549217315 | 1.3461189748  | 0.0000000000  |
| C | 0.5679671056  | 0.9920891394  | 1.3632768361  |
| C | 0.5679671056  | 0.9920891394  | -1.3632768361 |
| H | 0.0223701762  | 1.1596095782  | 2.2902085718  |
| H | 0.0223701762  | 1.1596095782  | -2.2902085718 |
| H | 0.9019679358  | -0.0452804942 | 1.3280544118  |
| H | 1.4295144664  | 1.6584114114  | 1.3331421726  |
| H | 1.4295144664  | 1.6584114114  | -1.3331421726 |
| H | 0.9019679358  | -0.0452804942 | -1.3280544118 |
| H | -0.9496576424 | -1.2957821002 | 0.0000000000  |
| C | -0.4500560745 | -2.2409991176 | 0.0000000000  |
| C | 0.1337731180  | -3.2969450363 | 0.0000000000  |
| H | 0.6402069624  | -4.2318378900 | 0.0000000000  |

$E[(\text{H}_3\text{C})_2\text{S}\cdots\text{HCCH}] = -554.65688148 \text{ au}$

**(H<sub>3</sub>C)<sub>2</sub>S□HCP**

|   |              |              |               |
|---|--------------|--------------|---------------|
| S | 0.0000000000 | 0.3343851242 | -0.0180387798 |
|---|--------------|--------------|---------------|

|   |               |               |               |
|---|---------------|---------------|---------------|
| C | 1.3630820868  | -0.0043772973 | -1.1457939790 |
| C | -1.3630820868 | -0.0043772973 | -1.1457939790 |
| H | 2.2902111772  | 0.1565434958  | -0.5985376842 |
| H | -2.2902111772 | 0.1565434958  | -0.5985376842 |
| H | 1.3283984258  | -1.0374140044 | -1.4932136409 |
| H | 1.3323490894  | 0.6728719234  | -1.9988300920 |
| H | -1.3323490894 | 0.6728719234  | -1.9988300920 |
| H | -1.3283984258 | -1.0374140044 | -1.4932136409 |
| H | 0.0000000000  | -2.3206492863 | 0.3528794728  |
| C | 0.0000000000  | -3.2680656510 | -0.1596284256 |
| P | 0.0000000000  | -4.6155428318 | -0.9147664586 |

$E[(\text{H}_3\text{C})_2\text{S}\cdots\text{HCP}] = -856.95285543 \text{ au}$

## $\text{H}_2\text{C}=\text{S}\square\text{HX}$

### $\text{H}_2\text{C}=\text{S}\square\text{HF}$

|   |               |              |               |
|---|---------------|--------------|---------------|
| H | -0.8116507796 | 0.0000000000 | -0.5787570615 |
| H | 1.0324952179  | 0.0000000000 | -0.3964232499 |
| C | 0.0543664398  | 0.0000000000 | 0.0756790561  |
| S | -0.1073033848 | 0.0000000000 | 1.6808759062  |
| H | 2.1002314066  | 0.0000000000 | 1.8068507697  |
| F | 2.9928611002  | 0.0000000000 | 1.5359717692  |

$E(\text{H}_2\text{C}=\text{S}\square\text{HF}) = -537.34223785 \text{ au}$

### $\text{H}_2\text{C}=\text{S}\square\text{HCl}$

|    |               |              |               |
|----|---------------|--------------|---------------|
| H  | -0.8806183751 | 0.0000000000 | -0.5993494637 |
| H  | 0.9668494996  | 0.0000000000 | -0.4678034825 |
| C  | 0.0019065435  | 0.0000000000 | 0.0330939883  |
| S  | -0.1144275551 | 0.0000000000 | 1.6412653013  |
| H  | 2.2266200561  | 0.0000000000 | 1.6341644169  |
| Cl | 3.4386698311  | 0.0000000000 | 1.1828264297  |

$E(\text{H}_2\text{C}=\text{S}\square\text{HCl}) = -897.32233758 \text{ au}$

### $\text{H}_2\text{C}=\text{S}\square\text{HBr}$

|    |               |              |               |
|----|---------------|--------------|---------------|
| H  | -0.8355888892 | 0.0000000000 | -0.5604009295 |
| H  | 1.0150597271  | 0.0000000000 | -0.4788839505 |
| C  | 0.0636690750  | 0.0000000000 | 0.0480681809  |
| S  | -0.0086387707 | 0.0000000000 | 1.6583642182  |
| H  | 2.3320955849  | 0.0000000000 | 1.5899023415  |
| Br | 3.6724032731  | 0.0000000000 | 1.0671473293  |

$E(\text{H}_2\text{C}=\text{S}\square\text{HBr}) = -853.27496961 \text{ au}$

### $\text{H}_2\text{C}=\text{S}\square\text{HI}$

|   |               |              |               |
|---|---------------|--------------|---------------|
| H | -0.8300676940 | 0.0000000000 | -0.5730687070 |
| H | 1.0182689270  | 0.0000000000 | -0.4658537836 |
| C | 0.0598468400  | 0.0000000000 | 0.0492200139  |
| S | -0.0350971661 | 0.0000000000 | 1.6578407962  |
| H | 2.3949013265  | 0.0000000000 | 1.5904519363  |
| I | 3.9111477667  | 0.0000000000 | 0.9856069341  |

$E(\text{H}_2\text{C}=\text{S}\square\text{HI}) = -732.39815654 \text{ au}$

**H<sub>2</sub>C=S□HCN**

|   |               |              |               |
|---|---------------|--------------|---------------|
| H | -0.8073720138 | 0.0000000000 | -0.6570488424 |
| H | 1.0221708689  | 0.0000000000 | -0.4082040308 |
| C | 0.0289112507  | 0.0000000000 | 0.0356762018  |
| S | -0.1977776728 | 0.0000000000 | 1.6317594344  |
| H | 2.3941188481  | 0.0000000000 | 1.7528449374  |
| C | 3.3235788326  | 0.0000000000 | 1.2134782191  |
| N | 4.3041005731  | 0.0000000000 | 0.6013912703  |

$E(\text{H}_2\text{C}=\text{S}\square\text{HCN}) = -530.26446902$  au

**H<sub>2</sub>C=S□HCCH**

|   |               |              |               |
|---|---------------|--------------|---------------|
| H | -0.6943874938 | 0.0000000000 | -0.7549106129 |
| H | 1.0907661048  | 0.0000000000 | -0.2695221517 |
| C | 0.0477367572  | 0.0000000000 | 0.0383682036  |
| S | -0.3786683838 | 0.0000000000 | 1.5927658147  |
| H | 2.3714617016  | 0.0000000000 | 1.8918125883  |
| C | 3.2740407621  | 0.0000000000 | 1.3214474908  |
| C | 4.2816745457  | 0.0000000000 | 0.6581810986  |
| H | 5.1751066929  | 0.0000000000 | 0.0817547586  |

$E(\text{H}_2\text{C}=\text{S}\square\text{HCCH}) = -514.17019887$  au

**H<sub>2</sub>C=S□HCP**

|   |               |              |               |
|---|---------------|--------------|---------------|
| H | -0.7536831364 | 0.0000000000 | -0.6907924073 |
| H | 1.0610303896  | 0.0000000000 | -0.3330644595 |
| C | 0.0424919633  | 0.0000000000 | 0.0483094783  |
| S | -0.2721207652 | 0.0000000000 | 1.6289506915  |
| H | 2.4908875420  | 0.0000000000 | 1.7432084319  |
| C | 3.3770363049  | 0.0000000000 | 1.1329632594  |
| P | 4.6373134964  | 0.0000000000 | 0.2403221957  |

$E(\text{H}_2\text{C}=\text{S}\square\text{HCP}) = -816.46607508$  au

**Thiirene□HX****Thiirene□HF**

|   |               |               |               |
|---|---------------|---------------|---------------|
| S | 0.0000000000  | -0.7757711018 | -1.1168378034 |
| C | 0.6401064057  | 0.8895816326  | -1.5812532177 |
| C | -0.6401064057 | 0.8895816326  | -1.5812532177 |
| H | 1.5922263473  | 1.3672819760  | -1.7060690835 |
| H | -1.5922263473 | 1.3672819760  | -1.7060690835 |
| H | 0.0000000000  | -0.3483177041 | 1.0024845878  |
| F | 0.0000000000  | 0.0170131507  | 1.8651633767  |

$E(\text{thiirene}\square\text{HF}) = -575.31862909$  au

**Thiirene□HCl**

|   |               |               |               |
|---|---------------|---------------|---------------|
| S | 0.0000000000  | -0.8368668868 | -1.2593142942 |
| C | 0.6401916863  | 0.8676000012  | -1.5453306180 |
| C | -0.6401916863 | 0.8676000012  | -1.5453306180 |
| H | 1.5915558183  | 1.3573134728  | -1.6189993918 |
| H | -1.5915558183 | 1.3573134728  | -1.6189993918 |



|    |              |               |              |
|----|--------------|---------------|--------------|
| H  | 0.0000000000 | -0.4061411054 | 0.9363089163 |
| Cl | 0.0000000000 | 0.1998326063  | 2.0891022979 |

$E(\text{thiirene} \square \text{HCl}) = -935.29841196 \text{ au}$

**Thiirene  $\square$  HBr**

|    |               |               |               |
|----|---------------|---------------|---------------|
| S  | 0.0000000000  | -0.8364754666 | -1.2487563892 |
| C  | 0.6402984810  | 0.8656880042  | -1.5382484968 |
| C  | -0.6402984810 | 0.8656880042  | -1.5382484968 |
| H  | 1.5917953970  | 1.3551596670  | -1.6126819711 |
| H  | -1.5917953970 | 1.3551596670  | -1.6126819711 |
| H  | 0.0000000000  | -0.4024118222 | 0.9146774229  |
| Br | 0.0000000000  | 0.3040435085  | 2.1842745046  |

$E(\text{thiirene} \square \text{HBr}) = -891.25116724 \text{ au}$

**Thiirene  $\square$  HI**

|   |               |               |               |
|---|---------------|---------------|---------------|
| S | 0.0000000000  | -0.8327435285 | -1.1753802537 |
| C | 0.6404741071  | 0.8670699241  | -1.4721953969 |
| C | -0.6404741071 | 0.8670699241  | -1.4721953969 |
| H | 1.5911278787  | 1.3579395017  | -1.5490305450 |
| H | -1.5911278787 | 1.3579395017  | -1.5490305450 |
| H | 0.0000000000  | -0.3344429810 | 1.0133459723  |
| I | 0.0000000000  | 0.5238192201  | 2.4216141494  |

$E(\text{thiirene} \square \text{HI}) = -770.37400669 \text{ au}$

**Thiirene  $\square$  HCN**

|   |               |               |               |
|---|---------------|---------------|---------------|
| S | 0.0000000000  | -0.8666061223 | -1.3862546087 |
| C | 0.6405113586  | 0.8615925142  | -1.4675703499 |
| C | -0.6405113586 | 0.8615925142  | -1.4675703499 |
| H | 1.5890282992  | 1.3619576693  | -1.4970203702 |
| H | -1.5890282992 | 1.3619576693  | -1.4970203702 |
| H | 0.0000000000  | -0.4673434092 | 1.0734231744  |
| C | 0.0000000000  | 0.1548946671  | 1.9536001349  |
| N | 0.0000000000  | 0.8386060594  | 2.8858496399  |

$E(\text{thiirene} \square \text{HCN}) = -568.24055657 \text{ au}$

**Thiirene  $\square$  HCCH**

|   |               |               |               |
|---|---------------|---------------|---------------|
| S | 0.0000000000  | -0.8831244125 | -1.5160699690 |
| C | 0.6405189112  | 0.8458908131  | -1.5031469571 |
| C | -0.6405189112 | 0.8458908131  | -1.5031469571 |
| H | 1.5878624529  | 1.3485903873  | -1.4917335395 |
| H | -1.5878624529 | 1.3485903873  | -1.4917335395 |
| H | 0.0000000000  | -0.4689417982 | 1.1004546694  |
| C | 0.0000000000  | 0.1734472289  | 1.9553255159  |
| C | 0.0000000000  | 0.9031624333  | 2.9164942729  |
| H | 0.0000000000  | 1.5421457099  | 3.7659934043  |

$E(\text{thiirene} \square \text{HCCH}) = -552.14481947 \text{ au}$

**Thiirene  $\square$  HCP**

|   |               |               |               |
|---|---------------|---------------|---------------|
| S | 0.0000000000  | -0.8774904429 | -1.4673364751 |
| C | 0.6405257130  | 0.8514766588  | -1.4664271412 |
| C | -0.6405257130 | 0.8514766588  | -1.4664271412 |
| H | 1.5878596541  | 1.3543940002  | -1.4594011515 |

|   |               |               |               |
|---|---------------|---------------|---------------|
| H | -1.5878596541 | 1.3543940002  | -1.4594011515 |
| H | 0.0000000000  | -0.4413433984 | 1.1469140723  |
| C | 0.0000000000  | 0.2252610223  | 1.9933919198  |
| P | 0.0000000000  | 1.1892520514  | 3.2009356491  |

$E(\text{thiirene} \square \text{HCP}) = -854.44083359 \text{ au}$

## S<sub>2</sub> □ HX

### S<sub>2</sub> □ HF

|   |              |               |               |
|---|--------------|---------------|---------------|
| S | 0.0000000000 | -0.1086675994 | 0.0942640641  |
| S | 0.0000000000 | -0.2419116581 | 1.9942079077  |
| H | 0.0000000000 | 2.1716209513  | -0.0749357760 |
| F | 0.0000000000 | 3.0989583061  | -0.1045361957 |

$E(\text{S}_2 \square \text{HF}) = -895.83267815 \text{ au}$

### S<sub>2</sub> □ HCl

|    |              |               |               |
|----|--------------|---------------|---------------|
| Cl | 0.0000000000 | -0.3172478163 | -2.4373966680 |
| H  | 0.0000000000 | 0.2498499819  | -1.2840485913 |
| S  | 0.0000000000 | 1.0127519832  | 1.0377476762  |
| S  | 0.0000000000 | -0.7834812485 | 1.6700309489  |

$E(\text{S}_2 \square \text{HCl}) = -1255.81362317 \text{ au}$

### S<sub>2</sub> □ HBr

|    |              |               |               |
|----|--------------|---------------|---------------|
| Br | 0.0000000000 | -0.0489963915 | -1.7881095860 |
| H  | 0.0000000000 | 0.3248218679  | -0.4099445540 |
| S  | 0.0000000000 | 0.9741039857  | 1.9819087327  |
| S  | 0.0000000000 | -0.8622010938 | 2.4875331848  |

$E(\text{S}_2 \square \text{HBr}) = -1211.76631589 \text{ au}$

### S<sub>2</sub> □ HI

|   |              |               |               |
|---|--------------|---------------|---------------|
| I | 0.0000000000 | -0.0180703332 | -1.4279577451 |
| H | 0.0000000000 | 0.3595600511  | 0.1476096595  |
| S | 0.0000000000 | 0.9713372221  | 2.6783840899  |
| S | 0.0000000000 | -0.9111123967 | 2.9693628578  |

$E(\text{S}_2 \square \text{HI}) = -1090.89008501 \text{ au}$

### S<sub>2</sub> □ HCN

|   |              |               |               |
|---|--------------|---------------|---------------|
| S | 0.0000000000 | 0.9651358546  | -1.2313374711 |
| S | 0.0000000000 | -0.9403439341 | -1.2375181951 |
| H | 0.0000000000 | -0.4999625258 | 1.3678465180  |
| C | 0.0000000000 | -0.1878631018 | 2.3927558474  |
| N | 0.0000000000 | 0.1403276269  | 3.5007114421  |

$E(\text{S}_2 \square \text{HCN}) = -888.75693991 \text{ au}$

### S<sub>2</sub> □ HCCH

|   |              |               |               |
|---|--------------|---------------|---------------|
| S | 0.0000000000 | 0.8258627900  | -1.3574652526 |
| S | 0.0000000000 | -1.0770029290 | -1.2651471961 |
| H | 0.0000000000 | -0.4738801281 | 1.4631230251  |
| C | 0.0000000000 | -0.1335480089 | 2.4731193785  |
| C | 0.0000000000 | 0.2468196284  | 3.6174940910  |

|   |              |              |              |
|---|--------------|--------------|--------------|
| H | 0.0000000000 | 0.5840650015 | 4.6255878353 |
|---|--------------|--------------|--------------|

$E(S_2 \square HCCH) = -872.66240622$  au

**$S_2 \square HCP$**

|   |              |               |               |
|---|--------------|---------------|---------------|
| S | 0.0000000000 | 0.9770103640  | -1.9183684192 |
| S | 0.0000000000 | -0.9265336887 | -1.9952782272 |
| H | 0.0000000000 | -0.5091864521 | 0.7685889421  |
| C | 0.0000000000 | -0.2700352633 | 1.8156396197  |
| P | 0.0000000000 | 0.0690371699  | 3.3218173213  |

$E(S_2 \square HCP) = -1174.95849367$  au

**$(CH_3)_3N \square HX$**

**$(CH_3)_3N \square HF$**

|   |               |               |               |
|---|---------------|---------------|---------------|
| N | -0.0000000000 | 0.0000000000  | -0.3629305312 |
| C | 1.3860784376  | 0.0000000000  | -0.8263266282 |
| C | -0.6930392188 | -1.2003791386 | -0.8263266282 |
| C | -0.6930392188 | 1.2003791386  | -0.8263266282 |
| H | 1.4432713342  | 0.0000000000  | -1.9233599508 |
| H | -0.7216356671 | -1.2499096400 | -1.9233599508 |
| H | -0.7216356671 | 1.2499096400  | -1.9233599508 |
| H | 1.8950268910  | -0.8849921824 | -0.4462059992 |
| H | 1.8950268910  | 0.8849921824  | -0.4462059992 |
| H | -1.7139391576 | -1.1986453373 | -0.4462059992 |
| H | -0.1810877334 | -2.0836375197 | -0.4462059992 |
| H | -0.1810877334 | 2.0836375197  | -0.4462059992 |
| H | -1.7139391576 | 1.1986453373  | -0.4462059992 |
| H | -0.0000000000 | 0.0000000000  | 1.2509461171  |
| F | -0.0000000000 | 0.0000000000  | 2.2166071207  |

$E[(CH_3)_3N \cdots HF] = -274.60638179$  au

**$(CH_3)_3N \square HCl$**

Proton transfer

**$(CH_3)_3N \square HBr$**

Proton transfer

**$(CH_3)_3N \square HI$**

Proton transfer

**$(CH_3)_3N \square HCN$**

|   |               |               |               |
|---|---------------|---------------|---------------|
| N | -0.0000000000 | 0.0000000000  | -0.8902851499 |
| C | 1.3812125679  | 0.0000000000  | -1.3554900451 |
| C | -0.6906062839 | -1.1961651718 | -1.3554900451 |
| C | -0.6906062839 | 1.1961651718  | -1.3554900451 |
| H | 1.4444629411  | 0.0000000000  | -2.4544125307 |
| H | -0.7222314705 | -1.2509416018 | -2.4544125307 |
| H | -0.7222314705 | 1.2509416018  | -2.4544125307 |
| H | 1.8948363668  | -0.8854698384 | -0.9800666470 |
| H | 1.8948363668  | 0.8854698384  | -0.9800666470 |

|   |               |               |               |
|---|---------------|---------------|---------------|
| H | -1.7142575577 | -1.1982415105 | -0.9800666470 |
| H | -0.1805788091 | -2.0837113489 | -0.9800666470 |
| H | -0.1805788091 | 2.0837113489  | -0.9800666470 |
| H | -1.7142575577 | 1.1982415105  | -0.9800666470 |
| H | -0.0000000000 | 0.0000000000  | 1.1129965903  |
| C | -0.0000000000 | 0.0000000000  | 2.2037319880  |
| N | -0.0000000000 | 0.0000000000  | 3.3605533830  |

$E[(\text{CH}_3)\text{N}\cdots\text{HCN}] = -267.52197046 \text{ au}$

**(CH<sub>3</sub>)N□HCCH**

|   |               |               |               |
|---|---------------|---------------|---------------|
| N | -0.0000000000 | 0.0000000000  | -0.9221009098 |
| C | 1.3792906640  | 0.0000000000  | -1.3849383805 |
| C | -0.6896453320 | -1.1945007542 | -1.3849383805 |
| C | -0.6896453320 | 1.1945007542  | -1.3849383805 |
| H | 1.4470379437  | 0.0000000000  | -2.4851034269 |
| H | -0.7235189719 | -1.2531716195 | -2.4851034269 |
| H | -0.7235189719 | 1.2531716195  | -2.4851034269 |
| H | 1.8927434775  | -0.8850750086 | -1.0081227510 |
| H | 1.8927434775  | 0.8850750086  | -1.0081227510 |
| H | -1.7128691805 | -1.1966264300 | -1.0081227510 |
| H | -0.1798742970 | -2.0817014387 | -1.0081227510 |
| H | -0.1798742970 | 2.0817014387  | -1.0081227510 |
| H | -1.7128691805 | 1.1966264300  | -1.0081227510 |
| H | -0.0000000000 | 0.0000000000  | 1.2559517413  |
| C | -0.0000000000 | 0.0000000000  | 2.3320199560  |
| C | -0.0000000000 | 0.0000000000  | 3.5396832913  |
| H | -0.0000000000 | 0.0000000000  | 4.6028460968  |

$E[(\text{CH}_3)\text{N}\cdots\text{HCCH}] = -251.42446667 \text{ au}$

**(CH<sub>3</sub>)N□HCP**

|   |               |               |               |
|---|---------------|---------------|---------------|
| N | -0.0000000000 | 0.0000000000  | -1.6340152459 |
| C | 1.3793416060  | 0.0000000000  | -2.0966569856 |
| C | -0.6896708030 | -1.1945448713 | -2.0966569856 |
| C | -0.6896708030 | 1.1945448713  | -2.0966569856 |
| H | 1.4473191948  | 0.0000000000  | -3.1967593236 |
| H | -0.7236595974 | -1.2534151901 | -3.1967593236 |
| H | -0.7236595974 | 1.2534151901  | -3.1967593236 |
| H | 1.8927557203  | -0.8850990359 | -1.7198318960 |
| H | 1.8927557203  | 0.8850990359  | -1.7198318960 |
| H | -1.7128961101 | -1.1966250190 | -1.7198318960 |
| H | -0.1798596102 | -2.0817240549 | -1.7198318960 |
| H | -0.1798596102 | 2.0817240549  | -1.7198318960 |
| H | -1.7128961101 | 1.1966250190  | -1.7198318960 |
| H | -0.0000000000 | 0.0000000000  | 0.5459727095  |
| C | -0.0000000000 | 0.0000000000  | 1.6298956052  |
| P | 0.0000000000  | 0.0000000000  | 3.1761196446  |

$E[(\text{CH}_3)\text{N}\cdots\text{HCP}] = -553.72037504 \text{ au}$

**Aza-tetrahedrane□HX**

**Azatetrahedrane□HF**

|   |               |              |              |
|---|---------------|--------------|--------------|
| N | -0.0000000000 | 0.0000000000 | 0.0683615403 |
|---|---------------|--------------|--------------|

|   |               |               |               |
|---|---------------|---------------|---------------|
| C | 0.8356939033  | 0.0000000000  | 1.2930551772  |
| C | -0.4178469517 | -0.7237321501 | 1.2930551772  |
| C | -0.4178469517 | 0.7237321501  | 1.2930551772  |
| H | 1.8921492950  | 0.0000000000  | 1.4567247616  |
| H | -0.9460746475 | -1.6386493572 | 1.4567247616  |
| H | -0.9460746475 | 1.6386493572  | 1.4567247616  |
| H | 0.0000000000  | 0.0000000000  | -1.7090224306 |
| F | 0.0000000000  | 0.0000000000  | -2.6440358269 |

$E(\text{Azatetrahedrane}\cdots\text{HF}) = -270.82516549 \text{ au}$

#### Azatetrahedrane□HCl

|    |               |               |               |
|----|---------------|---------------|---------------|
| N  | -0.0000000000 | 0.0000000000  | 0.7565956071  |
| C  | 0.8352725389  | 0.0000000000  | 1.9853159296  |
| C  | -0.4176362695 | -0.7233672378 | 1.9853159296  |
| C  | -0.4176362695 | 0.7233672378  | 1.9853159296  |
| H  | 1.8914482008  | 0.0000000000  | 2.1507913801  |
| H  | -0.9457241004 | -1.6380421919 | 2.1507913801  |
| H  | -0.9457241004 | 1.6380421919  | 2.1507913801  |
| H  | 0.0000000000  | 0.0000000000  | -1.1734916887 |
| Cl | 0.0000000000  | 0.0000000000  | -2.4667896471 |

$E(\text{Azatetrahedrane}\cdots\text{HCl}) = -630.80304413 \text{ au}$

#### Azatetrahedrane□HBr

|    |               |               |               |
|----|---------------|---------------|---------------|
| N  | -0.0000000000 | 0.0000000000  | 1.6792348388  |
| C  | 0.8352603338  | 0.0000000000  | 2.9086952852  |
| C  | -0.4176301669 | -0.7233566678 | 2.9086952852  |
| C  | -0.4176301669 | 0.7233566678  | 2.9086952852  |
| H  | 1.8914518695  | 0.0000000000  | 3.0740855035  |
| H  | -0.9457259348 | -1.6380453690 | 3.0740855035  |
| H  | -0.9457259348 | 1.6380453690  | 3.0740855035  |
| H  | 0.0000000000  | 0.0000000000  | -0.2834818051 |
| Br | 0.0000000000  | 0.0000000000  | -1.7188038697 |

$E(\text{Azatetrahedrane}\cdots\text{HBr}) = -586.75486057 \text{ au}$

#### Azatetrahedrane□HI

|   |               |               |               |
|---|---------------|---------------|---------------|
| N | -0.0000000000 | 0.0000000000  | 2.3445047288  |
| C | 0.8349931504  | 0.0000000000  | 3.5759205404  |
| C | -0.4174965752 | -0.7231252803 | 3.5759205404  |
| C | -0.4174965752 | 0.7231252803  | 3.5759205404  |
| H | 1.8909036354  | 0.0000000000  | 3.7428965846  |
| H | -0.9454518177 | -1.6375705844 | 3.7428965846  |
| H | -0.9454518177 | 1.6375705844  | 3.7428965846  |
| H | -0.0000000000 | 0.0000000000  | 0.2612198558  |
| I | 0.0000000000  | 0.0000000000  | -1.3653560740 |

$E(\text{Azatetrahedrane}\cdots\text{HI}) = -465.87697759 \text{ au}$

#### Azatetrahedrane□HCN

|   |               |               |              |
|---|---------------|---------------|--------------|
| N | -0.0000000000 | 0.0000000000  | 0.6545612818 |
| C | 0.8347484940  | 0.0000000000  | 1.8864707490 |
| C | -0.4173742470 | -0.7229134016 | 1.8864707490 |
| C | -0.4173742470 | 0.7229134016  | 1.8864707490 |
| H | 1.8905436157  | 0.0000000000  | 2.0545205625 |
| H | -0.9452718078 | -1.6372587981 | 2.0545205625 |

|   |               |              |               |
|---|---------------|--------------|---------------|
| H | -0.9452718078 | 1.6372587981 | 2.0545205625  |
| H | -0.0000000000 | 0.0000000000 | -1.4484370728 |
| C | 0.0000000000  | 0.0000000000 | -2.5253827311 |
| N | 0.0000000000  | 0.0000000000 | -3.6813549749 |

$E(\text{Azatetrahedrane}\cdots\text{HCN}) = -263.74642556 \text{ au}$

#### Azatetrahedrane□HCCH

|   |               |               |               |
|---|---------------|---------------|---------------|
| N | -0.0000000000 | 0.0000000000  | 0.6791776776  |
| C | 0.8347349419  | 0.0000000000  | 1.9116888614  |
| C | -0.4173674709 | -0.7229016651 | 1.9116888614  |
| C | -0.4173674709 | 0.7229016651  | 1.9116888614  |
| H | 1.8904258744  | 0.0000000000  | 2.0792711568  |
| H | -0.9452129372 | -1.6371568312 | 2.0792711568  |
| H | -0.9452129372 | 1.6371568312  | 2.0792711568  |
| H | 0.0000000000  | 0.0000000000  | -1.5797865936 |
| C | 0.0000000000  | 0.0000000000  | -2.6491793084 |
| C | 0.0000000000  | 0.0000000000  | -3.8560171359 |
| H | 0.0000000000  | 0.0000000000  | -4.9189632697 |

$E(\text{Azatetrahedrane}\cdots\text{HCCH}) = -247.64929357 \text{ au}$

#### Azatetrahedrane□HCP

|   |               |               |               |
|---|---------------|---------------|---------------|
| N | -0.0000000000 | 0.0000000000  | 1.4944146178  |
| C | 0.8347081109  | 0.0000000000  | 2.7272247642  |
| C | -0.4173540554 | -0.7228784288 | 2.7272247642  |
| C | -0.4173540554 | 0.7228784288  | 2.7272247642  |
| H | 1.8903615895  | 0.0000000000  | 2.8951376180  |
| H | -0.9451807948 | -1.6371011589 | 2.8951376180  |
| H | -0.9451807948 | 1.6371011589  | 2.8951376180  |
| H | 0.0000000000  | 0.0000000000  | -0.7681500407 |
| C | 0.0000000000  | 0.0000000000  | -1.8453438497 |
| P | 0.0000000000  | 0.0000000000  | -3.3905346996 |

$E(\text{Azatetrahedrane}\cdots\text{HCP}) = -549.94524573 \text{ au}$

### H<sub>3</sub>N□HX

#### H<sub>3</sub>N□HF

|   |               |               |               |
|---|---------------|---------------|---------------|
| F | -0.0000000000 | 0.0000000000  | -1.2755099300 |
| H | -0.0000000000 | 0.0000000000  | -0.3268906373 |
| N | 0.0000000000  | 0.0000000000  | 1.3758104940  |
| H | 0.9404250901  | 0.0000000000  | 1.7499629552  |
| H | -0.4702125451 | 0.8144320184  | 1.7499629552  |
| H | -0.4702125451 | -0.8144320184 | 1.7499629552  |

$E(\text{H}_3\text{N}\cdots\text{HF}) = -156.88546362 \text{ au}$

#### H<sub>3</sub>N□HCl

|    |               |               |               |
|----|---------------|---------------|---------------|
| Cl | -0.0000000000 | 0.0000000000  | -1.0439618345 |
| H  | -0.0000000000 | 0.0000000000  | 0.2699577364  |
| N  | 0.0000000000  | 0.0000000000  | 2.0908955228  |
| H  | 0.9407284038  | 0.0000000000  | 2.4647404270  |
| H  | -0.4703642019 | 0.8146946957  | 2.4647404270  |
| H  | -0.4703642019 | -0.8146946957 | 2.4647404270  |

$E(\text{H}_3\text{N}\cdots\text{HCl}) = -516.86143489 \text{ au}$

### $\text{H}_3\text{N}\square\text{HBr}$

|    |               |               |               |
|----|---------------|---------------|---------------|
| Br | -0.0000000000 | 0.0000000000  | -0.5940083940 |
| H  | -0.0000000000 | 0.0000000000  | 0.8709023696  |
| N  | 0.0000000000  | 0.0000000000  | 2.6695900883  |
| H  | 0.9419630530  | 0.0000000000  | 3.0404196978  |
| H  | -0.4709815265 | 0.8157639333  | 3.0404196978  |
| H  | -0.4709815265 | -0.8157639333 | 3.0404196978  |

$E(\text{H}_3\text{N}\cdots\text{HBr}) = -472.81309990 \text{ au}$

### $\text{H}_3\text{N}\square\text{HI}$

Proton transfer

### $\text{H}_3\text{N}\square\text{HCN}$

|   |               |               |               |
|---|---------------|---------------|---------------|
| C | -0.0000000000 | 0.0000000000  | -0.9209155486 |
| H | -0.0000000000 | 0.0000000000  | 0.1607289486  |
| N | 0.0000000000  | 0.0000000000  | 2.2798593116  |
| H | 0.9365080982  | 0.0000000000  | 2.6654912619  |
| H | -0.4682540491 | 0.8110398039  | 2.6654912619  |
| H | -0.4682540491 | -0.8110398039 | 2.6654912619  |
| N | 0.0000000000  | 0.0000000000  | -2.0771601941 |

$E(\text{H}_3\text{N}\cdots\text{HCN}) = -149.80274841 \text{ au}$

### $\text{H}_3\text{N}\square\text{HCCH}$

|   |               |               |               |
|---|---------------|---------------|---------------|
| C | -0.0000000000 | 0.0000000000  | -0.9907347424 |
| H | -0.0000000000 | 0.0000000000  | 0.0811340771  |
| N | 0.0000000000  | 0.0000000000  | 2.3689334568  |
| H | 0.9369848738  | 0.0000000000  | 2.7524841518  |
| H | -0.4684924369 | 0.8114527037  | 2.7524841518  |
| H | -0.4684924369 | -0.8114527037 | 2.7524841518  |
| C | 0.0000000000  | 0.0000000000  | -2.1979218978 |
| H | 0.0000000000  | 0.0000000000  | -3.2608887965 |

$E(\text{H}_3\text{N}\cdots\text{HCCH}) = -133.70539742 \text{ au}$

### $\text{H}_3\text{N}\square\text{HCP}$

|   |               |               |               |
|---|---------------|---------------|---------------|
| C | -0.0000000000 | 0.0000000000  | -0.1945114490 |
| H | -0.0000000000 | 0.0000000000  | 0.8850080699  |
| N | 0.0000000000  | 0.0000000000  | 3.1813286670  |
| H | 0.9369419905  | 0.0000000000  | 3.5651243113  |
| H | -0.4684709952 | 0.8114155656  | 3.5651243113  |
| H | -0.4684709952 | -0.8114155656 | 3.5651243113  |
| P | 0.0000000000  | 0.0000000000  | -1.7400524978 |

$E(\text{H}_3\text{N}\cdots\text{HCP}) = -436.00122192 \text{ au}$

### $\text{Cl}_3\text{N}\square\text{HX}$

#### $\text{Cl}_3\text{N}\square\text{HF}$

|    |               |               |               |
|----|---------------|---------------|---------------|
| N  | -0.0000000000 | 0.0000000000  | 0.0707348031  |
| Cl | 1.6349541772  | 0.0000000000  | -0.5417920114 |
| Cl | -0.8174770886 | -1.4159118514 | -0.5417920114 |

|    |               |              |               |
|----|---------------|--------------|---------------|
| Cl | -0.8174770886 | 1.4159118514 | -0.5417920114 |
| H  | -0.0000000000 | 0.0000000000 | 1.9490297880  |
| F  | -0.0000000000 | 0.0000000000 | 2.8775676721  |

$E(\text{Cl}_3\text{N}\cdots\text{HF}) = -1534.19488501$  au

**Cl<sub>3</sub>N□HCl**

|    |               |               |               |
|----|---------------|---------------|---------------|
| N  | -0.0000000000 | 0.0000000000  | -0.3492960626 |
| Cl | 1.6350976242  | 0.0000000000  | -0.9665536877 |
| Cl | -0.8175488121 | -1.4160360802 | -0.9665536877 |
| Cl | -0.8175488121 | 1.4160360802  | -0.9665536877 |
| H  | -0.0000000000 | 0.0000000000  | 1.7045570391  |
| Cl | -0.0000000000 | 0.0000000000  | 2.9891991540  |

$E(\text{Cl}_3\text{N}\cdots\text{HCl}) = -1894.17544743$  au

**Cl<sub>3</sub>N□HBr**

|    |               |               |               |
|----|---------------|---------------|---------------|
| N  | -0.0000000000 | 0.0000000000  | -1.0803823668 |
| Cl | 1.6352149510  | 0.0000000000  | -1.6986580923 |
| Cl | -0.8176074755 | -1.4161376882 | -1.6986580923 |
| Cl | -0.8176074755 | 1.4161376882  | -1.6986580923 |
| H  | -0.0000000000 | 0.0000000000  | 1.0108954850  |
| Br | -0.0000000000 | 0.0000000000  | 2.4376908007  |

$E(\text{Cl}_3\text{N}\cdots\text{HBr}) = -1850.12807591$  au

**Cl<sub>3</sub>N□HI**

|    |               |               |               |
|----|---------------|---------------|---------------|
| N  | -0.0000000000 | 0.0000000000  | -1.6996560604 |
| Cl | 1.6350010768  | 0.0000000000  | -2.3215401455 |
| Cl | -0.8175005384 | -1.4159524677 | -2.3215401455 |
| Cl | -0.8175005384 | 1.4159524677  | -2.3215401455 |
| H  | -0.0000000000 | 0.0000000000  | 0.5094168534  |
| I  | -0.0000000000 | 0.0000000000  | 2.1292222337  |

$E(\text{Cl}_3\text{N}\cdots\text{HI}) = -1729.25168030$  au

**Cl<sub>3</sub>N□HCN**

|    |               |               |               |
|----|---------------|---------------|---------------|
| N  | -0.0000000000 | 0.0000000000  | -0.2611451898 |
| Cl | 1.6348986707  | 0.0000000000  | -0.8830854495 |
| Cl | -0.8174493353 | -1.4158637814 | -0.8830854495 |
| Cl | -0.8174493353 | 1.4158637814  | -0.8830854495 |
| H  | -0.0000000000 | 0.0000000000  | 1.9797250766  |
| C  | -0.0000000000 | 0.0000000000  | 3.0517977752  |
| N  | -0.0000000000 | 0.0000000000  | 4.2073636532  |

$E(\text{Cl}_3\text{N}\cdots\text{HCN}) = -1527.11835123$  au

**Cl<sub>3</sub>N□HCCH**

|    |               |               |               |
|----|---------------|---------------|---------------|
| N  | -0.0000000000 | 0.0000000000  | -0.2610286405 |
| Cl | 1.6343606938  | 0.0000000000  | -0.8886281980 |
| Cl | -0.8171803469 | -1.4153978798 | -0.8886281980 |
| Cl | -0.8171803469 | 1.4153978798  | -0.8886281980 |
| H  | -0.0000000000 | 0.0000000000  | 2.1012755967  |
| C  | -0.0000000000 | 0.0000000000  | 3.1673931607  |
| C  | -0.0000000000 | 0.0000000000  | 4.3733729754  |
| H  | -0.0000000000 | 0.0000000000  | 5.4364888638  |

$E(\text{Cl}_3\text{N}\cdots\text{HCCH}) = -1511.02403895$  au



**Cl<sub>3</sub>N···HCP**

|    |               |               |               |
|----|---------------|---------------|---------------|
| N  | -0.0000000000 | 0.0000000000  | -0.7988884766 |
| Cl | 1.6344486152  | 0.0000000000  | -1.4265337079 |
| Cl | -0.8172243076 | -1.4154740220 | -1.4265337079 |
| Cl | -0.8172243076 | 1.4154740220  | -1.4265337079 |
| H  | -0.0000000000 | 0.0000000000  | 1.5665116358  |
| C  | -0.0000000000 | 0.0000000000  | 2.6408458363  |
| P  | -0.0000000000 | 0.0000000000  | 4.1847144416  |

$E(\text{Cl}_3\text{N}\cdots\text{HCP}) = -1813.32009340 \text{ au}$

**H<sub>3</sub>P···HX****H<sub>3</sub>P···HF**

|   |               |               |               |
|---|---------------|---------------|---------------|
| H | -0.0000000000 | 0.0000000000  | 1.1965328889  |
| F | -0.0000000000 | 0.0000000000  | 2.1248138765  |
| P | 0.0000000000  | 0.0000000000  | -1.1575390879 |
| H | 1.2047956360  | 0.0000000000  | -1.8882984700 |
| H | -0.6023978179 | -1.0433836271 | -1.8882984700 |
| H | -0.6023978179 | 1.0433836271  | -1.8882984700 |

$E(\text{H}_3\text{P}\cdots\text{HF}) = -443.08513383 \text{ au}$

**H<sub>3</sub>P···HCl**

|    |               |               |               |
|----|---------------|---------------|---------------|
| H  | 0.0000000000  | 0.0000000000  | 0.6253277561  |
| Cl | 0.0000000000  | 0.0000000000  | 1.9098488264  |
| P  | -0.0000000000 | 0.0000000000  | -1.9437307194 |
| H  | 1.1997267311  | 0.0000000000  | -2.6861041897 |
| H  | -0.5998633656 | -1.0389938268 | -2.6861041897 |
| H  | -0.5998633656 | 1.0389938268  | -2.6861041897 |

$E(\text{H}_3\text{P}\cdots\text{HCl}) = -803.06521136 \text{ au}$

**H<sub>3</sub>P···HBr**

|    |               |               |               |
|----|---------------|---------------|---------------|
| H  | 0.0000000000  | 0.0000000000  | -0.1980265017 |
| Br | 0.0000000000  | 0.0000000000  | 1.2286725401  |
| P  | 0.0000000000  | 0.0000000000  | -2.8156413932 |
| H  | 1.1988955113  | 0.0000000000  | -3.5601494300 |
| H  | -0.5994477557 | -1.0382739693 | -3.5601494300 |
| H  | -0.5994477557 | 1.0382739693  | -3.5601494300 |

$E(\text{H}_3\text{P}\cdots\text{HBr}) = -759.01769308 \text{ au}$

**H<sub>3</sub>P···HI**

|   |               |               |               |
|---|---------------|---------------|---------------|
| H | 0.0000000000  | 0.0000000000  | -0.6721024854 |
| I | 0.0000000000  | 0.0000000000  | 0.9475352584  |
| P | 0.0000000000  | 0.0000000000  | -3.4502834965 |
| H | 1.1963043086  | 0.0000000000  | -4.2005308017 |
| H | -0.5981521543 | -1.0360299219 | -4.2005308017 |
| H | -0.5981521543 | 1.0360299219  | -4.2005308017 |

$E(\text{H}_3\text{P}\cdots\text{HI}) = -638.14114320 \text{ au}$

**H<sub>3</sub>P···HCN**

|   |               |              |               |
|---|---------------|--------------|---------------|
| P | -0.0000000000 | 0.0000000000 | -1.9337058547 |
|---|---------------|--------------|---------------|

|   |               |               |               |
|---|---------------|---------------|---------------|
| H | 1.1978234865  | 0.0000000000  | -2.6799233303 |
| H | -0.5989117433 | -1.0373455686 | -2.6799233303 |
| H | -0.5989117433 | 1.0373455686  | -2.6799233303 |
| H | -0.0000000000 | 0.0000000000  | 0.8855404657  |
| C | 0.0000000000  | 0.0000000000  | 1.9571163088  |
| N | 0.0000000000  | 0.0000000000  | 3.1126711628  |

$E(\text{H}_3\text{P}\square\text{HCN}) = -436.00824429$  au

### **H<sub>3</sub>P□HCCH**

|   |               |               |               |
|---|---------------|---------------|---------------|
| P | -0.0000000000 | 0.0000000000  | -1.9811141630 |
| H | 1.1938912948  | 0.0000000000  | -2.7360165704 |
| H | -0.5969456474 | -1.0339401906 | -2.7360165704 |
| H | -0.5969456474 | 1.0339401906  | -2.7360165704 |
| H | 0.0000000000  | 0.0000000000  | 1.0056931972  |
| C | 0.0000000000  | 0.0000000000  | 2.0715226013  |
| C | 0.0000000000  | 0.0000000000  | 3.2774997979  |
| H | 0.0000000000  | 0.0000000000  | 4.3405260300  |

$E(\text{H}_3\text{P}\square\text{HCCH}) = -419.91364944$  au

### **H<sub>3</sub>P□HCP**

CCSD(T)-F12C/CC-PVDZ-F12 ENERGY=-722.20992033

|   |               |               |               |
|---|---------------|---------------|---------------|
| P | -0.0000000000 | 0.0000000000  | -2.8604114618 |
| H | 1.1938714012  | 0.0000000000  | -3.6154492908 |
| H | -0.5969357006 | -1.0339229622 | -3.6154492908 |
| H | -0.5969357006 | 1.0339229622  | -3.6154492908 |
| H | 0.0000000000  | 0.0000000000  | 0.1258696523  |
| C | 0.0000000000  | 0.0000000000  | 1.1999975848  |
| P | 0.0000000000  | 0.0000000000  | 2.7439395781  |

$E(\text{H}_3\text{P}\square\text{HCP}) = -722.20965532$  au

## **(CH<sub>3</sub>)<sub>3</sub>P□HX**

### **(CH<sub>3</sub>)<sub>3</sub>P□HF**

|   |               |               |               |
|---|---------------|---------------|---------------|
| P | -0.0000000000 | 0.0000000000  | -0.2415322601 |
| C | 1.6286930840  | 0.0000000000  | -1.0822145636 |
| C | -0.8143465420 | -1.4104895857 | -1.0822145636 |
| C | -0.8143465420 | 1.4104895857  | -1.0822145636 |
| H | 1.5160366340  | 0.0000000000  | -2.1686499739 |
| H | -0.7580183170 | -1.3129262381 | -2.1686499739 |
| H | -0.7580183170 | 1.3129262381  | -2.1686499739 |
| H | 2.1953090172  | -0.8822072899 | -0.7827191135 |
| H | 2.1953090172  | 0.8822072899  | -0.7827191135 |
| H | -1.8616684331 | -1.4600897331 | -0.7827191135 |
| H | -0.3336405841 | -2.3422970230 | -0.7827191135 |
| H | -0.3336405841 | 2.3422970230  | -0.7827191135 |
| H | -1.8616684331 | 1.4600897331  | -0.7827191135 |
| H | -0.0000000000 | 0.0000000000  | 1.9957895232  |
| F | -0.0000000000 | 0.0000000000  | 2.9347821561  |

$E[(\text{CH}_3)_3\text{P}\square\text{HF}] = -560.86213184$  au

**(CH<sub>3</sub>)<sub>3</sub>P□HCl**

|    |               |               |               |
|----|---------------|---------------|---------------|
| P  | -0.0000000000 | 0.0000000000  | -0.8237598225 |
| C  | 1.6265094516  | 0.0000000000  | -1.6726662432 |
| C  | -0.8132547258 | -1.4085985046 | -1.6726662432 |
| C  | -0.8132547258 | 1.4085985046  | -1.6726662432 |
| H  | 1.5104686607  | 0.0000000000  | -2.7589922603 |
| H  | -0.7552343303 | -1.3081042317 | -2.7589922603 |
| H  | -0.7552343303 | 1.3081042317  | -2.7589922603 |
| H  | 2.1947300043  | -0.8821607339 | -1.3756305620 |
| H  | 2.1947300043  | 0.8821607339  | -1.3756305620 |
| H  | -1.8613386080 | -1.4596115712 | -1.3756305620 |
| H  | -0.3333913963 | -2.3417723051 | -1.3756305620 |
| H  | -0.3333913963 | 2.3417723051  | -1.3756305620 |
| H  | -1.8613386080 | 1.4596115712  | -1.3756305620 |
| H  | -0.0000000000 | 0.0000000000  | 1.5437191908  |
| Cl | -0.0000000000 | 0.0000000000  | 2.8458003512  |

$E[(\text{CH}_3)_3\text{P}\square\text{HCl}] = -920.84071723 \text{ au}$

**(CH<sub>3</sub>)<sub>3</sub>P□HBr**

|    |               |               |               |
|----|---------------|---------------|---------------|
| P  | -0.0000000000 | 0.0000000000  | -1.6947232072 |
| C  | 1.6273199557  | 0.0000000000  | -2.5415432962 |
| C  | -0.8136599778 | -1.4093004217 | -2.5415432962 |
| C  | -0.8136599778 | 1.4093004217  | -2.5415432962 |
| H  | 1.5123064895  | 0.0000000000  | -3.6280159720 |
| H  | -0.7561532448 | -1.3096958382 | -3.6280159720 |
| H  | -0.7561532448 | 1.3096958382  | -3.6280159720 |
| H  | 2.1950169514  | -0.8822449279 | -2.2438465489 |
| H  | 2.1950169514  | 0.8822449279  | -2.2438465489 |
| H  | -1.8615549957 | -1.4598179777 | -2.2438465489 |
| H  | -0.3334619558 | -2.3420629057 | -2.2438465489 |
| H  | -0.3334619558 | 2.3420629057  | -2.2438465489 |
| H  | -1.8615549957 | 1.4598179777  | -2.2438465489 |
| H  | -0.0000000000 | 0.0000000000  | 0.6508769258  |
| Br | 0.0000000000  | 0.0000000000  | 2.1019695883  |

$E[(\text{CH}_3)_3\text{P}\square\text{HBr}] = -876.79310152 \text{ au}$

**(CH<sub>3</sub>)<sub>3</sub>P□HI**

|   |               |               |               |
|---|---------------|---------------|---------------|
| P | -0.0000000000 | 0.0000000000  | -2.3624377170 |
| C | 1.6253996932  | 0.0000000000  | -3.2157962643 |
| C | -0.8126998466 | -1.4076374256 | -3.2157962643 |
| C | -0.8126998466 | 1.4076374256  | -3.2157962643 |
| H | 1.5071921905  | 0.0000000000  | -4.3020595184 |
| H | -0.7535960952 | -1.3052667253 | -4.3020595184 |
| H | -0.7535960952 | 1.3052667253  | -4.3020595184 |
| H | 2.1943918012  | -0.8822133725 | -2.9202535314 |
| H | 2.1943918012  | 0.8822133725  | -2.9202535314 |
| H | -1.8612150928 | -1.4592923594 | -2.9202535314 |
| H | -0.3331767084 | -2.3415057319 | -2.9202535314 |
| H | -0.3331767084 | 2.3415057319  | -2.9202535314 |
| H | -1.8612150928 | 1.4592923594  | -2.9202535314 |
| H | -0.0000000000 | 0.0000000000  | 0.0879942361  |
| I | -0.0000000000 | 0.0000000000  | 1.7306510867  |

$E[(\text{CH}_3)_3\text{P}\square\text{HI}] = -755.91550883 \text{ au}$

**(CH<sub>3</sub>)<sub>3</sub>P□HCN**

|   |               |               |               |
|---|---------------|---------------|---------------|
| P | -0.0000000000 | 0.0000000000  | -0.7456630321 |
| C | 1.6222499077  | 0.0000000000  | -1.6077869049 |
| C | -0.8111249538 | -1.4049096313 | -1.6077869049 |
| C | -0.8111249538 | 1.4049096313  | -1.6077869049 |
| H | 1.4981803507  | 0.0000000000  | -2.6933018276 |
| H | -0.7490901754 | -1.2974622432 | -2.6933018276 |
| H | -0.7490901754 | 1.2974622432  | -2.6933018276 |
| H | 2.1936330239  | -0.8821761627 | -1.3164910724 |
| H | 2.1936330239  | 0.8821761627  | -1.3164910724 |
| H | -1.8608034795 | -1.4586538439 | -1.3164910724 |
| H | -0.3328295444 | -2.3408300066 | -1.3164910724 |
| H | -0.3328295444 | 2.3408300066  | -1.3164910724 |
| H | -1.8608034795 | 1.4586538439  | -1.3164910724 |
| H | -0.0000000000 | 0.0000000000  | 1.9581742012  |
| C | -0.0000000000 | 0.0000000000  | 3.0352176288  |
| N | 0.0000000000  | 0.0000000000  | 4.1912353589  |

$E[(\text{CH}_3)_3\text{P}\square\text{HCN}] = -553.78261594 \text{ au}$

**(CH<sub>3</sub>)<sub>3</sub>P□HCCH**

|   |               |               |               |
|---|---------------|---------------|---------------|
| P | -0.0000000000 | 0.0000000000  | -0.7608179464 |
| C | 1.6190604013  | 0.0000000000  | -1.6331550291 |
| C | -0.8095302006 | -1.4021474378 | -1.6331550291 |
| C | -0.8095302006 | 1.4021474378  | -1.6331550291 |
| H | 1.4915053199  | 0.0000000000  | -2.7185755932 |
| H | -0.7457526599 | -1.2916814969 | -2.7185755932 |
| H | -0.7457526599 | 1.2916814969  | -2.7185755932 |
| H | 2.1919214717  | -0.8819585012 | -1.3436801668 |
| H | 2.1919214717  | 0.8819585012  | -1.3436801668 |
| H | -1.8597592030 | -1.4572804270 | -1.3436801668 |
| H | -0.3321622687 | -2.3392389282 | -1.3436801668 |
| H | -0.3321622687 | 2.3392389282  | -1.3436801668 |
| H | -1.8597592030 | 1.4572804270  | -1.3436801668 |
| H | -0.0000000000 | 0.0000000000  | 2.1209457888  |
| C | 0.0000000000  | 0.0000000000  | 3.1898329521  |
| C | 0.0000000000  | 0.0000000000  | 4.3964484564  |
| H | 0.0000000000  | 0.0000000000  | 5.4594844115  |

$E[(\text{CH}_3)_3\text{P}\square\text{HCCH}] = -537.68646021 \text{ au}$

**(CH<sub>3</sub>)<sub>3</sub>P□HCP**

|   |               |               |               |
|---|---------------|---------------|---------------|
| P | -0.0000000000 | 0.0000000000  | -1.4967150889 |
| C | 1.6190313621  | 0.0000000000  | -2.3690417116 |
| C | -0.8095156810 | -1.4021222891 | -2.3690417116 |
| C | -0.8095156810 | 1.4021222891  | -2.3690417116 |
| H | 1.4912235090  | 0.0000000000  | -3.4544442193 |
| H | -0.7456117545 | -1.2914374415 | -3.4544442193 |
| H | -0.7456117545 | 1.2914374415  | -3.4544442193 |
| H | 2.1919532411  | -0.8819776751 | -2.0797940888 |
| H | 2.1919532411  | 0.8819776751  | -2.0797940888 |
| H | -1.8597916928 | -1.4572983531 | -2.0797940888 |
| H | -0.3321615483 | -2.3392760282 | -2.0797940888 |
| H | -0.3321615483 | 2.3392760282  | -2.0797940888 |

|   |               |              |               |
|---|---------------|--------------|---------------|
| H | -1.8597916928 | 1.4572983531 | -2.0797940888 |
| H | -0.0000000000 | 0.0000000000 | 1.3774471479  |
| C | -0.0000000000 | 0.0000000000 | 2.4544886598  |
| P | -0.0000000000 | 0.0000000000 | 3.9994107922  |

$E[(\text{CH}_3)_3\text{P} \square \text{HCP}] = -839.98250356 \text{ au}$

Table S2. Energies (au) of monomers B and HX optimised at the CCSD(T)(F12c)/cc-pVDZ-F12 level

|                                   |              |      |            |
|-----------------------------------|--------------|------|------------|
| CO                                | -113.186968  | FH   | -100.37353 |
| SC                                | -435.715480  | ClH  | -460.35645 |
| SeC                               | -410.001593  | BrH  | -416.30951 |
| H <sub>3</sub> CNC                | -132.524823  | IH   | -295.43406 |
| HNC                               | -93.276342   | NCH  | -93.300098 |
| FNC                               | -192.322881  | HCCH | -77.207269 |
| H <sub>3</sub> CCN                | -132.563405  | HCP  | -379.50326 |
| HCN                               | -93.300098   |      |            |
| FCN                               | -192.436792  |      |            |
| N <sub>2</sub>                    | -77.207269   |      |            |
| PN                                | -395.573259  |      |            |
| OCO                               | -188.383340  |      |            |
| SCO                               | -510.965386  |      |            |
| HB                                | -25.233554   |      |            |
| FB                                | -124.537593  |      |            |
| H <sub>3</sub> CB                 | -64.517248   |      |            |
| Oxirene                           | -152.277363  |      |            |
| (CH <sub>3</sub> ) <sub>2</sub> O | -154.822753  |      |            |
| H <sub>2</sub> C=O                | -114.367526  |      |            |
| H <sub>2</sub> C=C=O              | -152.401232  |      |            |
| H <sub>2</sub> O                  | -76.359838   |      |            |
| H <sub>2</sub> S                  | -398.950517  |      |            |
| (H <sub>3</sub> C) <sub>2</sub> S | -477.444678  |      |            |
| H <sub>2</sub> C=S                | -436.958865  |      |            |
| Thiirene                          | -474.932964  |      |            |
| S <sub>2</sub>                    | -795.452733  |      |            |
| (CH <sub>3</sub> ) <sub>3</sub> N | -174.210473  |      |            |
| Azatetrahedrane                   | -170.436873  |      |            |
| H <sub>3</sub> N                  | -56.492524   |      |            |
| Cl <sub>3</sub> N                 | -1433.814294 |      |            |
| H <sub>3</sub> P                  | -342.704240  |      |            |
| (CH <sub>3</sub> ) <sub>3</sub> P | -460.475311  |      |            |
